# Supplementary material for: The Biology of Veganism: Plasma Metabolomics Analysis Reveals Distinct Profiles of Vegans and Non-Vegetarians in the Adventist Health Study-2 Cohort
Source: MDPI journal article supplement (doi:10.3390/nu14030709), 2022-02-08
Supplement: s1 [file s1]

**Table S1.** Amino acid metabolites associated with a vegan (relative to non-vegetarian) dietary pattern at FDR < 0.05 in linear regression models with SmartSVA approach.

| Metabolite                                      | Fold Change | FDR      | Subclass                                         |
|-------------------------------------------------|-------------|----------|--------------------------------------------------|
| 2-hydroxy-4-(methylthio)butanoic acid           | 1.57        | <3.9E-05 | Methionine, Cysteine, SAM and Taurine Metabolism |
| kynurenate                                      | 1.32        | <3.9E-05 | Tryptophan Metabolism                            |
| indoleacetylglutamine                           | 2.31        | <3.9E-05 | Tryptophan Metabolism                            |
| 2-oxoarginine                                   | 1.86        | <3.9E-05 | Urea cycle; Arginine and Proline Metabolism      |
| phenylalanine                                   | 1.11        | <3.9E-05 | Phenylalanine Metabolism                         |
| isovaleryl carnitine (c5)                       | 1.57        | <3.9E-05 | Leucine, Isoleucine and Valine Metabolism        |
| 3-hydroxy-2-ethylpropionate                     | 1.41        | <3.9E-05 | Leucine, Isoleucine and Valine Metabolism        |
| isovaleryl glycine                              | 1.65        | <3.9E-05 | Leucine, Isoleucine and Valine Metabolism        |
| n-acetylphenylalanine                           | 1.45        | <3.9E-05 | Phenylalanine Metabolism                         |
| n-formylanthranilic acid                        | 1.77        | <3.9E-05 | Tryptophan Metabolism                            |
| n-acetyltyrosine                                | 1.61        | <3.9E-05 | Tyrosine Metabolism                              |
| indole-3-carboxylate                            | 1.59        | <3.9E-05 | Tryptophan Metabolism                            |
| 2-hydroxyphenylacetate                          | 1.48        | <3.9E-05 | Phenylalanine Metabolism                         |
| anthranilate                                    | 1.69        | <3.9E-05 | Tryptophan Metabolism                            |
| glutamate                                       | 1.41        | <3.9E-05 | Glutamate Metabolism                             |
| xanthurenate                                    | 2.01        | <3.9E-05 | Tryptophan Metabolism                            |
| valine                                          | 1.30        | <3.9E-05 | Leucine, Isoleucine and Valine Metabolism        |
| 1-carboxyethylleucine                           | 1.69        | <3.9E-05 | Leucine, Isoleucine and Valine Metabolism        |
| 6-oxopiperidine-2-carboxylate                   | 1.87        | <3.9E-05 | Lysine Metabolism                                |
| 2,3-dihydroxy-5-methylthio-4-pentenoate (dmtpa) | 1.21        | <3.9E-05 | Methionine, Cysteine, SAM and Taurine Metabolism |
| 2-methylbutyrylcarnitine (c5)                   | 1.71        | <3.9E-05 | Leucine, Isoleucine and Valine Metabolism        |
| 1-carboxyethyltyrosine                          | 1.80        | <3.9E-05 | Tyrosine Metabolism                              |
| creatine                                        | 1.68        | <3.9E-05 | Creatine Metabolism                              |
| homocitrulline                                  | 1.80        | <3.9E-05 | Urea cycle; Arginine and Proline Metabolism      |
| tiglyl carnitine (c5)                           | 1.65        | <3.9E-05 | Leucine, Isoleucine and Valine Metabolism        |
| beta-hydroxyisovaleryl carnitine                | 1.67        | <3.9E-05 | Leucine, Isoleucine and Valine Metabolism        |
| 1-carboxyethylvaline                            | 1.66        | <3.9E-05 | Leucine, Isoleucine and Valine Metabolism        |
| urea                                            | 1.38        | <3.9E-05 | Urea cycle; Arginine and Proline Metabolism      |
| methionine sulfoxide                            | 1.34        | <3.9E-05 | Methionine, Cysteine, SAM and Taurine Metabolism |
| n-acetylvaline                                  | 1.27        | <3.9E-05 | Leucine, Isoleucine and Valine Metabolism        |
| formiminoglutamate                              | 1.84        | <3.9E-05 | Histidine Metabolism                             |
| 1-carboxyethylphenylalanine                     | 1.54        | <3.9E-05 | Phenylalanine Metabolism                         |
| 1-carboxyethylisoleucine                        | 1.77        | <3.9E-05 | Leucine, Isoleucine and Valine Metabolism        |
| hydroxyproline                                  | 1.48        | <3.9E-05 | Urea cycle; Arginine and Proline Metabolism      |
| n6-acetyllysine                                 | 1.41        | <3.9E-05 | Lysine Metabolism                                |
| 1-methylhistidine                               | 1.66        | <3.9E-05 | Histidine Metabolism                             |
| 2-amino adipate                                 | 1.84        | <3.9E-05 | Lysine Metabolism                                |
| n,n,n-trimethyl-5-aminovalerate                 | 4.16        | <3.9E-05 | Lysine Metabolism                                |
| 3-methylhistidine                               | 14.99       | <3.9E-05 | Histidine Metabolism                             |
| 1-methyl-5-imidazoleacetate                     | 11.46       | <3.9E-05 | Histidine Metabolism                             |
| phenyllactate (pla)                             | 1.26        | 5.6E-05  | Phenylalanine Metabolism                         |
| lysine                                          | 1.14        | 5.8E-05  | Lysine Metabolism                                |
| asparagine                                      | 0.86        | 6.0E-05  | Alanine and Aspartate Metabolism                 |
| 2,3-dihydroxy-2-methylbutyrate                  | 0.65        | 6.4E-05  | Leucine, Isoleucine and Valine Metabolism        |
| 3-indoxyl sulfate                               | 1.61        | 7.3E-05  | Tryptophan Metabolism                            |
| cysteine sulfinic acid                          | 1.12        | 7.3E-05  | Methionine, Cysteine, SAM and Taurine Metabolism |
| gentisate                                       | 0.53        | 7.8E-05  | Tyrosine Metabolism                              |
| n-acetylmethionine sulfoxide                    | 1.43        | 8.6E-05  | Methionine, Cysteine, SAM and Taurine Metabolism |
| n2,n5-diacetylmethionine                        | 0.65        | 8.7E-05  | Urea cycle; Arginine and Proline Metabolism      |
| aspartate                                       | 1.29        | 8.7E-05  | Alanine and Aspartate Metabolism                 |
| n-methylproline                                 | 0.44        | 9.0E-05  | Urea cycle; Arginine and Proline Metabolism      |
| indolepropionate                                | 0.49        | 9.8E-05  | Tryptophan Metabolism                            |
| c-glycosyltryptophan                            | 1.16        | 1.0E-04  | Tryptophan Metabolism                            |
| s-methylcysteine sulfoxide                      | 0.52        | 1.1E-04  | Methionine, Cysteine, SAM and Taurine Metabolism |
| pyroglutamine                                   | 0.66        | 1.1E-04  | Glutamate Metabolism                             |
| s-methylcysteine                                | 0.63        | 1.1E-04  | Methionine, Cysteine, SAM and Taurine Metabolism |
| 2-hydroxybutyrate/2-hydroxyisobutyrate          | 1.31        | 1.2E-04  | Glutathione Metabolism                           |
| 2-methylserine                                  | 0.51        | 1.3E-04  | Glycine, Serine and Threonine Metabolism         |
| beta-hydroxyisovalerate                         | 1.46        | 1.3E-04  | Leucine, Isoleucine and Valine Metabolism        |
| n-acetylglutamate                               | 1.23        | 1.3E-04  | Glutamate Metabolism                             |
| n-delta-acetylmethionine                        | 0.56        | 1.6E-04  | Urea cycle; Arginine and Proline Metabolism      |

|                                   |      |         |                                                  |
|-----------------------------------|------|---------|--------------------------------------------------|
| kynurenine                        | 1.19 | 1.6E-04 | Tryptophan Metabolism                            |
| 4-hydroxyglutamate                | 1.76 | 1.7E-04 | Glutamate Metabolism                             |
| isoleucine                        | 1.09 | 1.7E-04 | Leucine, Isoleucine and Valine Metabolism        |
| leucine                           | 1.10 | 1.9E-04 | Leucine, Isoleucine and Valine Metabolism        |
| s-methylmethionine                | 0.22 | 2.0E-04 | Methionine, Cysteine, SAM and Taurine Metabolism |
| isobutyrylcarnitine (c4)          | 1.48 | 2.0E-04 | Leucine, Isoleucine and Valine Metabolism        |
| indolelactate                     | 1.23 | 2.0E-04 | Tryptophan Metabolism                            |
| n-carbamoylalanine                | 1.90 | 2.1E-04 | Alanine and Aspartate Metabolism                 |
| imidazole propionate              | 1.72 | 2.5E-04 | Histidine Metabolism                             |
| n-acetylarginine                  | 1.32 | 3.0E-04 | Urea cycle; Arginine and Proline Metabolism      |
| 8-methoxykynurenate               | 1.51 | 3.4E-04 | Tryptophan Metabolism                            |
| hypotaurine                       | 0.72 | 3.5E-04 | Methionine, Cysteine, SAM and Taurine Metabolism |
| n2-acetyllysine                   | 1.46 | 3.7E-04 | Lysine Metabolism                                |
| 5-oxoproline                      | 1.22 | 4.4E-04 | Glutathione Metabolism                           |
| 2-hydroxy-3-methylvalerate        | 1.29 | 4.6E-04 | Leucine, Isoleucine and Valine Metabolism        |
| n-acetyl-1-methylhistidine        | 1.69 | 4.8E-04 | Histidine Metabolism                             |
| 2-aminobutyrate                   | 1.19 | 5.0E-04 | Glutathione Metabolism                           |
| n-acetyltaurine                   | 1.25 | 5.0E-04 | Methionine, Cysteine, SAM and Taurine Metabolism |
| n-acetyl glycine                  | 0.74 | 5.8E-04 | Glycine, Serine and Threonine Metabolism         |
| 5-methylthioadenosine (mta)       | 1.15 | 6.8E-04 | Polyamine Metabolism                             |
| creatinine                        | 1.08 | 6.9E-04 | Creatine Metabolism                              |
| n-acetyltryptophan                | 1.27 | 7.0E-04 | Tryptophan Metabolism                            |
| glutamine                         | 0.84 | 7.8E-04 | Glutamate Metabolism                             |
| beta-citrylglutamate              | 1.25 | 8.4E-04 | Glutamate Metabolism                             |
| alpha-hydroxyisovalerate          | 1.30 | 9.5E-04 | Leucine, Isoleucine and Valine Metabolism        |
| glycine                           | 0.85 | 1.0E-03 | Glycine, Serine and Threonine Metabolism         |
| glutaryl carnitine (c5-dc)        | 1.41 | 1.0E-03 | Lysine Metabolism                                |
| n-acetylcitrulline                | 1.60 | 1.2E-03 | Urea cycle; Arginine and Proline Metabolism      |
| 5-(galactosylhydroxy)-l-lysine    | 1.28 | 1.2E-03 | Lysine Metabolism                                |
| 3-methyl-2-oxobutyrate            | 1.15 | 1.3E-03 | Leucine, Isoleucine and Valine Metabolism        |
| 4-methoxyphenol sulfate           | 0.59 | 1.4E-03 | Tyrosine Metabolism                              |
| p-cresol glucuronide              | 2.39 | 1.5E-03 | Tyrosine Metabolism                              |
| 1-ribosyl-imidazoleacetate        | 0.82 | 1.5E-03 | Histidine Metabolism                             |
| tryptophan betaine                | 0.58 | 1.8E-03 | Tryptophan Metabolism                            |
| isobutyryl glycine (c4)           | 1.31 | 1.9E-03 | Leucine, Isoleucine and Valine Metabolism        |
| indoleacetate                     | 1.41 | 2.0E-03 | Tryptophan Metabolism                            |
| n-acetylalanine                   | 1.09 | 2.0E-03 | Alanine and Aspartate Metabolism                 |
| tyrosine                          | 1.11 | 2.0E-03 | Tyrosine Metabolism                              |
| carboxyethyl-gaba                 | 0.83 | 2.0E-03 | Glutamate Metabolism                             |
| prolylhydroxyproline              | 0.77 | 2.4E-03 | Urea cycle; Arginine and Proline Metabolism      |
| betaine                           | 0.86 | 2.5E-03 | Glycine, Serine and Threonine Metabolism         |
| n-formylphenylalanine             | 1.32 | 2.5E-03 | Tyrosine Metabolism                              |
| 3-hydroxyisobutyrate              | 1.28 | 2.9E-03 | Leucine, Isoleucine and Valine Metabolism        |
| s-adenosylhomocysteine (sah)      | 1.14 | 3.3E-03 | Methionine, Cysteine, SAM and Taurine Metabolism |
| 3-(4-hydroxyphenyl)lactate (hpla) | 1.18 | 3.5E-03 | Tyrosine Metabolism                              |
| cysteinylglycine disulfide        | 0.87 | 4.2E-03 | Glutathione Metabolism                           |
| hydroxyasparagine                 | 1.10 | 4.2E-03 | Alanine and Aspartate Metabolism                 |
| alpha-hydroxyisocaproate          | 1.17 | 5.4E-03 | Leucine, Isoleucine and Valine Metabolism        |
| n-acetylproline                   | 1.40 | 5.4E-03 | Urea cycle; Arginine and Proline Metabolism      |
| dimethylglycine                   | 1.31 | 5.5E-03 | Glycine, Serine and Threonine Metabolism         |
| cysteine s-sulfate                | 1.19 | 5.8E-03 | Methionine, Cysteine, SAM and Taurine Metabolism |
| imidazole lactate                 | 1.19 | 6.0E-03 | Histidine Metabolism                             |
| alpha-ketoglutaramate             | 1.14 | 6.5E-03 | Glutamate Metabolism                             |
| phenylacetate                     | 1.54 | 6.7E-03 | Phenylalanine Metabolism                         |
| hydroxy-n6,n6,6-trimethyllysine   | 1.14 | 7.1E-03 | Lysine Metabolism                                |
| vanillactate                      | 1.17 | 7.6E-03 | Tyrosine Metabolism                              |
| 5-hydroxylysine                   | 1.13 | 8.6E-03 | Lysine Metabolism                                |
| 3-methylglutaryl carnitine (2)    | 1.38 | 1.0E-02 | Leucine, Isoleucine and Valine Metabolism        |
| guanidinosuccinate                | 1.29 | 1.1E-02 | Guanidino and Acetamido Metabolism               |
| alanine                           | 1.08 | 1.1E-02 | Alanine and Aspartate Metabolism                 |
| 4-hydroxyphenylacetatoylcarnitine | 1.23 | 1.2E-02 | Tyrosine Metabolism                              |
| threonine                         | 1.10 | 1.3E-02 | Glycine, Serine and Threonine Metabolism         |
| hydantoin-5-propionate            | 1.25 | 1.3E-02 | Histidine Metabolism                             |
| 3-sulfo-l-alanine                 | 1.33 | 1.3E-02 | Methionine, Cysteine, SAM and Taurine Metabolism |
| cysteine-glutathione disulfide    | 0.68 | 1.5E-02 | Glutathione Metabolism                           |
| proline                           | 1.11 | 1.6E-02 | Urea cycle; Arginine and Proline Metabolism      |

|                        |      |         |                                                  |
|------------------------|------|---------|--------------------------------------------------|
| n-acetylcarnosine      | 1.21 | 1.6E-02 | Histidine Metabolism                             |
| 3-amino-2-piperidone   | 1.13 | 1.7E-02 | Urea cycle; Arginine and Proline Metabolism      |
| n-acetyl-isoputrescine | 0.87 | 2.1E-02 | Polyamine Metabolism                             |
| tyramine o-sulfate     | 1.54 | 2.3E-02 | Tyrosine Metabolism                              |
| homoarginine           | 1.16 | 2.5E-02 | Urea cycle; Arginine and Proline Metabolism      |
| 5-methylthioribose     | 0.93 | 2.5E-02 | Methionine, Cysteine, SAM and Taurine Metabolism |
| 6-bromotryptophan      | 0.89 | 3.0E-02 | Tryptophan Metabolism                            |
| n-acetylputrescine     | 0.89 | 3.0E-02 | Polyamine Metabolism                             |
| cysteine               | 1.07 | 3.3E-02 | Methionine, Cysteine, SAM and Taurine Metabolism |
| 4-guanidinobutanoate   | 1.22 | 3.5E-02 | Guanidino and Acetamido Metabolism               |
| fructosyllysine        | 1.16 | 3.5E-02 | Lysine Metabolism                                |
| indolebutyrate         | 1.28 | 3.6E-02 | Tryptophan Metabolism                            |
| guanidinoacetate       | 0.89 | 4.5E-02 | Creatine Metabolism                              |
| n-formylmethionine     | 1.06 | 4.5E-02 | Methionine, Cysteine, SAM and Taurine Metabolism |
| n-acetylisoleucine     | 1.17 | 4.6E-02 | Leucine, Isoleucine and Valine Metabolism        |
| n-acetylhistidine      | 1.11 | 4.8E-02 | Histidine Metabolism                             |

---

**Table S2.** Lipid metabolites associated with a vegan (relative to non-vegetarian) dietary pattern at FDR < 0.05 in linear regression models with SmartSVA approach.

| Metabolite                                              | Fold Change | FDR      | Subclass                                                     |
|---------------------------------------------------------|-------------|----------|--------------------------------------------------------------|
| palmitoyl-linoleoyl-glycerol (16:0/18:2) [1]            | 1.88        | <3.9E-05 | Diacylglycerol                                               |
| glycerophosphoethanolamine                              | 1.16        | <3.9E-05 | Phospholipid Metabolism                                      |
| 1-stearoyl-2-docosaheptaenoyl-gpe (18:0/22:6)           | 1.62        | <3.9E-05 | Phosphatidylethanolamine (PE)                                |
| glycerol                                                | 1.35        | <3.9E-05 | Glycerolipid Metabolism                                      |
| choline                                                 | 1.14        | <3.9E-05 | Phospholipid Metabolism                                      |
| 3,4-dihydroxybutyrate                                   | 1.20        | <3.9E-05 | Fatty Acid, Dihydroxy                                        |
| docosaheptaenoylcarnitine (c22:6)                       | 1.80        | <3.9E-05 | Fatty Acid Metabolism (Acyl Carnitine, Polyunsaturated)      |
| n-stearoyltaurine                                       | 1.37        | <3.9E-05 | Endocannabinoid                                              |
| glutarate (c5-dc)                                       | 1.83        | <3.9E-05 | Fatty Acid, Dicarboxylate                                    |
| myristoyl dihydrosphingomyelin (d18:0/14:0)             | 1.34        | <3.9E-05 | Dihydrosphingomyelins                                        |
| docosaheptaenoate (dha; 22:6n3)                         | 1.47        | <3.9E-05 | Long Chain Polyunsaturated Fatty Acid (n3 and n6)            |
| 1-palmitoylglycerol (16:0)                              | 1.46        | <3.9E-05 | Monoacylglycerol                                             |
| trimethylamine n-oxide                                  | 1.53        | <3.9E-05 | Phospholipid Metabolism                                      |
| myristoleate (14:1n5)                                   | 1.39        | <3.9E-05 | Long Chain Monounsaturated Fatty Acid                        |
| ceramide (d18:1/20:0, d16:1/22:0, d20:1/18:0)           | 1.42        | <3.9E-05 | Ceramides                                                    |
| stearoyl sphingomyelin (d18:1/18:0)                     | 1.25        | <3.9E-05 | Sphingomyelins                                               |
| n-stearoyl-sphingadienine (d18:2/18:0)                  | 1.65        | <3.9E-05 | Ceramides                                                    |
| stearoylcarnitine (c18)                                 | 1.33        | <3.9E-05 | Fatty Acid Metabolism (Acyl Carnitine, Long Chain Saturated) |
| myristoylcarnitine (c14)                                | 1.38        | <3.9E-05 | Fatty Acid Metabolism (Acyl Carnitine, Long Chain Saturated) |
| 1-myristoyl-2-palmitoyl-gpc (14:0/16:0)                 | 1.74        | <3.9E-05 | Phosphatidylcholine (PC)                                     |
| palmitoylcarnitine (c16)                                | 1.25        | <3.9E-05 | Fatty Acid Metabolism (Acyl Carnitine, Long Chain Saturated) |
| 1-(1-enyl-palmitoyl)-gpe (p-16:0)                       | 1.34        | <3.9E-05 | Lysoplasmalogen                                              |
| 1-(1-enyl-palmitoyl)-2-arachidonoyl-gpc (p-16:0/20:4)   | 1.32        | <3.9E-05 | Plasmalogen                                                  |
| sphingomyelin (d18:0/18:0, d19:0/17:0)                  | 1.64        | <3.9E-05 | Dihydrosphingomyelins                                        |
| palmitoyl ethanolamide                                  | 1.29        | <3.9E-05 | Endocannabinoid                                              |
| sphingomyelin (d18:2/23:1)                              | 1.35        | <3.9E-05 | Sphingomyelins                                               |
| ceramide (d16:1/24:1, d18:1/22:1)                       | 1.82        | <3.9E-05 | Ceramides                                                    |
| propionylcarnitine (c3)                                 | 1.65        | <3.9E-05 | Fatty Acid Metabolism (also BCAA Metabolism)                 |
| 1-pentadecanoylglycerol (15:0)                          | 1.51        | <3.9E-05 | Monoacylglycerol                                             |
| 1-palmitoleoylglycerol (16:1)                           | 1.65        | <3.9E-05 | Monoacylglycerol                                             |
| docosapentaenoate (n6 dpa; 22:5n6)                      | 1.59        | <3.9E-05 | Long Chain Polyunsaturated Fatty Acid (n3 and n6)            |
| palmitoleate (16:1n7)                                   | 1.48        | <3.9E-05 | Long Chain Monounsaturated Fatty Acid                        |
| stearate (18:0)                                         | 1.22        | <3.9E-05 | Long Chain Saturated Fatty Acid                              |
| n-stearoyl-sphinganine (d18:0/18:0)                     | 2.17        | <3.9E-05 | Dihydroceramides                                             |
| 10-undecenoate (11:1n1)                                 | 1.77        | <3.9E-05 | Medium Chain Fatty Acid                                      |
| palmitate (16:0)                                        | 1.25        | <3.9E-05 | Long Chain Saturated Fatty Acid                              |
| 1-(1-enyl-palmitoyl)-2-linoleoyl-gpe (p-16:0/18:2)      | 1.46        | <3.9E-05 | Plasmalogen                                                  |
| n-stearoyl-sphingosine (d18:1/18:0)                     | 1.79        | <3.9E-05 | Ceramides                                                    |
| 1-(1-enyl-stearoyl)-2-linoleoyl-gpe (p-18:0/18:2)       | 1.46        | <3.9E-05 | Plasmalogen                                                  |
| ceramide (d18:1/14:0, d16:1/16:0)                       | 1.91        | <3.9E-05 | Ceramides                                                    |
| 1-stearoyl-gpg (18:0)                                   | 1.89        | <3.9E-05 | Lysophospholipid                                             |
| sphingomyelin (d18:1/21:0, d17:1/22:0, d16:1/23:0)      | 1.49        | <3.9E-05 | Sphingomyelins                                               |
| 3-carboxy-4-methyl-5-pentyl-2-furanpropionate (3-cmpfp) | 1.89        | <3.9E-05 | Fatty Acid, Dicarboxylate                                    |
| 1-(1-enyl-stearoyl)-2-oleoyl-gpe (p-18:0/18:1)          | 1.57        | <3.9E-05 | Plasmalogen                                                  |
| 2r,3r-dihydroxybutyrate                                 | 1.68        | <3.9E-05 | Fatty Acid, Dihydroxy                                        |
| 1-myristoylglycerol (14:0)                              | 1.99        | <3.9E-05 | Monoacylglycerol                                             |
| 1-(1-enyl-palmitoyl)-2-arachidonoyl-gpe (p-16:0/20:4)   | 1.62        | <3.9E-05 | Plasmalogen                                                  |
| sphingomyelin (d18:1/19:0, d19:1/18:0)                  | 1.56        | <3.9E-05 | Sphingomyelins                                               |
| picolinoylglycine                                       | 1.84        | <3.9E-05 | Fatty Acid Metabolism (Acyl Glycine)                         |
| hydroxy-cmpf                                            | 11.34       | <3.9E-05 | Fatty Acid, Dicarboxylate                                    |
| ceramide (d18:1/17:0, d17:1/18:0)                       | 2.36        | <3.9E-05 | Ceramides                                                    |
| sphingomyelin (d18:1/14:0, d16:1/16:0)                  | 1.51        | <3.9E-05 | Sphingomyelins                                               |
| 1-(1-enyl-stearoyl)-gpe (p-18:0)                        | 1.75        | <3.9E-05 | Lysoplasmalogen                                              |
| myristate (14:0)                                        | 1.67        | <3.9E-05 | Long Chain Saturated Fatty Acid                              |
| 1-(1-enyl-stearoyl)-2-arachidonoyl-gpe (p-18:0/20:4)    | 1.81        | <3.9E-05 | Plasmalogen                                                  |
| undecenoylcarnitine (c11:1)                             | 2.18        | <3.9E-05 | Fatty Acid Metabolism (Acyl Carnitine, Monounsaturated)      |
| tridecenedioate (c13:1-dc)                              | 2.79        | <3.9E-05 | Fatty Acid, Dicarboxylate                                    |
| 1-margaroylglycerol (17:0)                              | 3.09        | <3.9E-05 | Monoacylglycerol                                             |
| sphingomyelin (d18:1/17:0, d17:1/18:0, d19:1/16:0)      | 1.49        | <3.9E-05 | Sphingomyelins                                               |
| 10-nonadecenoate (19:1n9)                               | 1.76        | <3.9E-05 | Long Chain Monounsaturated Fatty Acid                        |

|                                                                |       |          |                                                              |
|----------------------------------------------------------------|-------|----------|--------------------------------------------------------------|
| sphingomyelin (d18:1/25:0, d19:0/24:1, d20:1/23:0, d19:1/24:0) | 2.59  | <3.9E-05 | Sphingomyelins                                               |
| sphingomyelin (d17:1/14:0, d16:1/15:0)                         | 1.94  | <3.9E-05 | Sphingomyelins                                               |
| n-palmitoyl-heptadecaspingosine (d17:1/16:0)                   | 2.10  | <3.9E-05 | Ceramides                                                    |
| sphingomyelin (d17:2/16:0, d18:2/15:0)                         | 1.91  | <3.9E-05 | Sphingomyelins                                               |
| 3-carboxy-4-methyl-5-propyl-2-furanpropanoate (cmpf)           | 19.15 | <3.9E-05 | Fatty Acid, Dicarboxylate                                    |
| sphingomyelin (d17:1/16:0, d18:1/15:0, d16:1/17:0)             | 1.58  | <3.9E-05 | Sphingomyelins                                               |
| (16 or 17)-methylstearate (a19:0 or i19:0)                     | 2.43  | <3.9E-05 | Fatty Acid, Branched                                         |
| margarate (17:0)                                               | 1.64  | <3.9E-05 | Long Chain Saturated Fatty Acid                              |
| heptenedioate (c7:1-dc)                                        | 3.68  | <3.9E-05 | Fatty Acid, Dicarboxylate                                    |
| pentadecanoate (15:0)                                          | 1.52  | <3.9E-05 | Long Chain Saturated Fatty Acid                              |
| 10-heptadecenoate (17:1n7)                                     | 2.07  | <3.9E-05 | Long Chain Monounsaturated Fatty Acid                        |
| (12 or 13)-methylmyristate (a15:0 or i15:0)                    | 3.30  | <3.9E-05 | Fatty Acid, Branched                                         |
| margaroylcarnitine (c17)                                       | 2.41  | <3.9E-05 | Fatty Acid Metabolism (Acyl Carnitine, Long Chain Saturated) |
| (14 or 15)-methylpalmitate (a17:0 or i17:0)                    | 3.44  | <3.9E-05 | Fatty Acid, Branched                                         |
| stearoyl ethanolamide                                          | 1.22  | 3.9E-05  | Endocannabinoid                                              |
| cortolone glucuronide (1)                                      | 1.40  | 5.8E-05  | Corticosteroids                                              |
| 1-palmitoyl-2-palmitoleoyl-gpc (16:0/16:1)                     | 1.35  | 5.8E-05  | Phosphatidylcholine (PC)                                     |
| n-linoleoylglycine                                             | 0.59  | 6.2E-05  | Fatty Acid Metabolism (Acyl Glycine)                         |
| (2 or 3)-decanoate (10:1n7 or n8)                              | 0.66  | 6.3E-05  | Medium Chain Fatty Acid                                      |
| linolenoylcarnitine (c18:3)                                    | 0.77  | 6.8E-05  | Fatty Acid Metabolism (Acyl Carnitine, Polyunsaturated)      |
| glycosyl ceramide (d18:2/24:1, d18:1/24:2)                     | 0.72  | 7.1E-05  | Hexosylceramides (HCER)                                      |
| behenate (22:0)                                                | 1.68  | 7.1E-05  | Long Chain Saturated Fatty Acid                              |
| n-behenoyl-sphingadienine (d18:2/22:0)                         | 1.36  | 7.2E-05  | Ceramides                                                    |
| palmitoyl-linoleoyl-glycerol (16:0/18:2) [2]                   | 1.55  | 7.2E-05  | Diacylglycerol                                               |
| 3-hydroxydecanoate                                             | 0.74  | 7.3E-05  | Fatty Acid, Monohydroxy                                      |
| 1-oleoyl-gpc (18:1)                                            | 0.83  | 8.3E-05  | Lysophospholipid                                             |
| sphingomyelin (d18:2/24:2)                                     | 0.78  | 8.5E-05  | Sphingomyelins                                               |
| nonanoylcarnitine (c9)                                         | 1.42  | 8.8E-05  | Fatty Acid Metabolism (Acyl Carnitine, Medium Chain)         |
| adrenate (22:4n6)                                              | 1.29  | 8.8E-05  | Long Chain Polyunsaturated Fatty Acid (n3 and n6)            |
| 12,13-dihome                                                   | 0.60  | 9.5E-05  | Fatty Acid, Dihydroxy                                        |
| tetradecadienoate (14:2)                                       | 0.70  | 1.0E-04  | Long Chain Polyunsaturated Fatty Acid (n3 and n6)            |
| 1-palmitoyl-2-docosahexaenoyl-gpe (16:0/22:6)                  | 1.45  | 1.0E-04  | Phosphatidylethanolamine (PE)                                |
| 1-cerotoyl-gpc (26:0)                                          | 0.64  | 1.0E-04  | Lysophospholipid                                             |
| 1-linoleoyl-gpe (18:2)                                         | 0.78  | 1.1E-04  | Lysophospholipid                                             |
| dodecadienoate (12:2)                                          | 0.66  | 1.1E-04  | Fatty Acid, Dicarboxylate                                    |
| octadecadienedioate (c18:2-dc)                                 | 0.57  | 1.2E-04  | Fatty Acid, Dicarboxylate                                    |
| deoxycholic acid 12-sulfate                                    | 2.01  | 1.2E-04  | Secondary Bile Acid Metabolism                               |
| sphingomyelin (d18:1/24:1, d18:2/24:0)                         | 0.87  | 1.2E-04  | Sphingomyelins                                               |
| cis-4-decenoate (10:1n6)                                       | 0.61  | 1.2E-04  | Medium Chain Fatty Acid                                      |
| lactosyl-n-nervonoyl-sphingosine (d18:1/24:1)                  | 0.72  | 1.3E-04  | Lactosylceramides (LCER)                                     |
| sphingomyelin (d18:2/18:1)                                     | 1.27  | 1.3E-04  | Sphingomyelins                                               |
| 1,2-dilinoleoyl-gpc (18:2/18:2)                                | 0.76  | 1.4E-04  | Phosphatidylcholine (PC)                                     |
| octadecenedioly carnitine (c18:1-dc)                           | 0.59  | 1.4E-04  | Fatty Acid Metabolism (Acyl Carnitine, Dicarboxylate)        |
| 1-docosahexaenoylglycerol (22:6)                               | 1.57  | 1.5E-04  | Monoacylglycerol                                             |
| acetoacetate                                                   | 0.61  | 1.6E-04  | Ketone Bodies                                                |
| trans-2-hexenoylglycine                                        | 0.63  | 1.7E-04  | Fatty Acid Metabolism (Acyl Glycine)                         |
| 3-hydroxybutyrate (bhba)                                       | 0.54  | 1.7E-04  | Ketone Bodies                                                |
| 13-hode + 9-hode                                               | 1.27  | 1.8E-04  | Fatty Acid, Monohydroxy                                      |
| dodecenedioate (c12:1-dc)                                      | 0.53  | 1.8E-04  | Fatty Acid, Dicarboxylate                                    |
| sphingomyelin (d18:0/20:0, d16:0/22:0)                         | 1.38  | 1.8E-04  | Dihydrosphingomyelins                                        |
| sphingomyelin (d18:1/18:1, d18:2/18:0)                         | 1.18  | 1.9E-04  | Sphingomyelins                                               |
| 1-linoleoyl-2-arachidonoyl-gpc (18:2/20:4n6)                   | 0.84  | 2.1E-04  | Phosphatidylcholine (PC)                                     |
| 3-hydroxysebacate                                              | 0.61  | 2.1E-04  | Fatty Acid, Monohydroxy                                      |
| lactosyl-n-palmitoyl-sphingosine (d18:1/16:0)                  | 0.83  | 2.1E-04  | Lactosylceramides (LCER)                                     |
| 1-(1-enyl-palmitoyl)-gpc (p-16:0)                              | 1.19  | 2.1E-04  | Lysoplasmalogen                                              |
| palmitoleoyl-linoleoyl-glycerol (16:1/18:2) [1]                | 1.60  | 2.1E-04  | Diacylglycerol                                               |
| isoursodeoxycholate                                            | 2.00  | 2.1E-04  | Secondary Bile Acid Metabolism                               |
| branched chain 14:0 dicarboxylic acid                          | 0.28  | 2.2E-04  | Fatty Acid, Dicarboxylate                                    |
| linoleoyl-docosahexaenoyl-glycerol (18:2/22:6) [2]             | 1.69  | 2.4E-04  | Diacylglycerol                                               |
| 1-linoleoyl-gpc (18:2)                                         | 0.81  | 2.4E-04  | Lysophospholipid                                             |
| dodecanedioate (c12)                                           | 0.67  | 2.5E-04  | Fatty Acid, Dicarboxylate                                    |
| sphinganine                                                    | 1.26  | 2.7E-04  | Sphingolipid Synthesis                                       |
| 1-palmitoyl-gpg (16:0)                                         | 1.47  | 3.1E-04  | Lysophospholipid                                             |
| sphingomyelin (d18:2/24:1, d18:1/24:2)                         | 0.81  | 3.1E-04  | Sphingomyelins                                               |

|                                                        |      |         |                                                              |
|--------------------------------------------------------|------|---------|--------------------------------------------------------------|
| 2-hydroxyadipate                                       | 1.63 | 3.3E-04 | Fatty Acid, Dicarboxylate                                    |
| oleoyl-arachidonoyl-glycerol (18:1/20:4) [2]           | 1.40 | 3.3E-04 | Diacylglycerol                                               |
| octadecenedioate (c18:1-dc)                            | 0.55 | 3.5E-04 | Fatty Acid, Dicarboxylate                                    |
| 2-hydroxyglutarate                                     | 1.20 | 3.7E-04 | Fatty Acid, Dicarboxylate                                    |
| 3-hydroxydodecanedioate                                | 0.57 | 3.9E-04 | Fatty Acid, Dicarboxylate                                    |
| tetradecadienedioate (c14:2-dc)                        | 0.69 | 3.9E-04 | Fatty Acid, Dicarboxylate                                    |
| 1-linoleoyl-2-linolenoyl-gpc (18:2/18:3)               | 0.52 | 4.5E-04 | Phosphatidylcholine (PC)                                     |
| sphingomyelin (d18:2/14:0, d18:1/14:1)                 | 1.27 | 4.9E-04 | Sphingomyelins                                               |
| 3-hydroxyoctanoate                                     | 0.78 | 5.5E-04 | Fatty Acid, Monohydroxy                                      |
| n-linoleoyltaurine                                     | 0.68 | 5.8E-04 | Endocannabinoid                                              |
| lignoceroylcarnitine (c24)                             | 1.35 | 5.8E-04 | Fatty Acid Metabolism (Acyl Carnitine, Long Chain Saturated) |
| malonate                                               | 0.79 | 5.9E-04 | Fatty Acid Synthesis                                         |
| palmitoyl-sphingosine-phosphoethanolamine (d18:1/16:0) | 0.86 | 6.2E-04 | Ceramide PEs                                                 |
| glycohyocholate                                        | 0.35 | 6.3E-04 | Secondary Bile Acid Metabolism                               |
| 2-aminoheptanoate                                      | 0.79 | 7.7E-04 | Fatty Acid, Amino                                            |
| hexanoylglutamine                                      | 0.70 | 8.1E-04 | Fatty Acid Metabolism (Acyl Glutamine)                       |
| 2-palmitoleoylglycerol (16:1)                          | 1.69 | 8.3E-04 | Monoacylglycerol                                             |
| sebacate (c10-dc)                                      | 0.66 | 8.7E-04 | Fatty Acid, Dicarboxylate                                    |
| sphingosine                                            | 1.25 | 1.0E-03 | Sphingosines                                                 |
| 1-palmitoyl-2-docosaheptaenoyl-gpc (16:0/22:6)         | 1.16 | 1.1E-03 | Phosphatidylcholine (PC)                                     |
| 3-hydroxylaurate                                       | 0.77 | 1.2E-03 | Fatty Acid, Monohydroxy                                      |
| 3-hydroxybutyrylglycine                                | 0.70 | 1.2E-03 | Fatty Acid Metabolism (Acyl Glycine)                         |
| 2-hydroxysebacate                                      | 0.72 | 1.2E-03 | Fatty Acid, Dicarboxylate                                    |
| 3-hydroxy-3-methylglutarate                            | 1.16 | 1.2E-03 | Mevalonate Metabolism                                        |
| 14-hdohe/17-hdohe                                      | 1.45 | 1.2E-03 | Docosanoid                                                   |
| behenoyl sphingomyelin (d18:1/22:0)                    | 1.16 | 1.2E-03 | Sphingomyelins                                               |
| chiro-inositol                                         | 0.61 | 1.2E-03 | Inositol Metabolism                                          |
| ursodeoxycholate                                       | 2.27 | 1.3E-03 | Secondary Bile Acid Metabolism                               |
| 1-dihomo-linolenylglycerol (20:3)                      | 1.26 | 1.7E-03 | Monoacylglycerol                                             |
| 1-stearoyl-2-oleoyl-gpc (18:0/18:1)                    | 1.13 | 1.8E-03 | Phosphatidylcholine (PC)                                     |
| nonadecanoate (19:0)                                   | 1.14 | 1.8E-03 | Long Chain Saturated Fatty Acid                              |
| arachidoylecarnitine (c20)                             | 1.24 | 1.8E-03 | Fatty Acid Metabolism (Acyl Carnitine, Long Chain Saturated) |
| linolenate (18:3n3 or 3n6)                             | 0.79 | 1.9E-03 | Long Chain Polyunsaturated Fatty Acid (n3 and n6)            |
| 1-stearoyl-2-docosaheptaenoyl-gpc (18:0/22:6)          | 1.23 | 2.2E-03 | Phosphatidylcholine (PC)                                     |
| glycochenodeoxycholate 3-sulfate                       | 0.53 | 2.3E-03 | Primary Bile Acid Metabolism                                 |
| 1-linoleoyl-gpa (18:2)                                 | 1.23 | 2.5E-03 | Lysophospholipid                                             |
| 1-linolenoyl-gpc (18:3)                                | 0.83 | 2.7E-03 | Lysophospholipid                                             |
| 2-hydroxynervonate                                     | 0.82 | 2.7E-03 | Fatty Acid, Monohydroxy                                      |
| 1-palmitoyl-gpe (16:0)                                 | 1.13 | 2.8E-03 | Lysophospholipid                                             |
| sphingomyelin (d18:2/21:0, d16:2/23:0)                 | 1.19 | 2.8E-03 | Sphingomyelins                                               |
| n-palmitoyl-sphingosine (d18:1/16:0)                   | 1.15 | 2.8E-03 | Ceramides                                                    |
| 2-butenoylglycine                                      | 0.68 | 2.9E-03 | Fatty Acid Metabolism (Acyl Glycine)                         |
| cortisone                                              | 0.79 | 2.9E-03 | Corticosteroids                                              |
| sphingomyelin (d18:1/20:0, d16:1/22:0)                 | 1.11 | 3.1E-03 | Sphingomyelins                                               |
| eicosapentaenoate (epa; 20:5n3)                        | 1.27 | 3.1E-03 | Long Chain Polyunsaturated Fatty Acid (n3 and n6)            |
| 1-lignoceroyl-gpc (24:0)                               | 0.62 | 3.1E-03 | Lysophospholipid                                             |
| butyrate/isobutyrate (4:0)                             | 1.30 | 3.2E-03 | Short Chain Fatty Acid                                       |
| behenoylcarnitine (c22)                                | 1.30 | 3.2E-03 | Fatty Acid Metabolism (Acyl Carnitine, Long Chain Saturated) |
| taurodeoxycholate                                      | 2.07 | 3.2E-03 | Secondary Bile Acid Metabolism                               |
| docosatrienoate (22:3n6)                               | 1.56 | 3.3E-03 | Long Chain Polyunsaturated Fatty Acid (n3 and n6)            |
| nisinate (24:6n3)                                      | 1.79 | 3.4E-03 | Long Chain Polyunsaturated Fatty Acid (n3 and n6)            |
| 1-(1-enyl-oleoyl)-gpe (p-18:1)                         | 1.16 | 3.5E-03 | Lysoplasmalogen                                              |
| butyrylcarnitine (c4)                                  | 1.32 | 3.8E-03 | Fatty Acid Metabolism (also BCAA Metabolism)                 |
| hexadecanedioate (c16)                                 | 0.80 | 3.8E-03 | Fatty Acid, Dicarboxylate                                    |
| 9,10-dihome                                            | 0.73 | 3.8E-03 | Fatty Acid, Dihydroxy                                        |
| 3-hydroxyadipate                                       | 0.78 | 4.1E-03 | Fatty Acid, Dicarboxylate                                    |
| linoleoylcarnitine (c18:2)                             | 0.82 | 4.1E-03 | Fatty Acid Metabolism (Acyl Carnitine, Polyunsaturated)      |
| 3beta-hydroxy-5-cholestenoate                          | 0.84 | 4.2E-03 | Sterol                                                       |
| carnitine                                              | 1.24 | 4.3E-03 | Carnitine Metabolism                                         |
| oleoyl-arachidonoyl-glycerol (18:1/20:4) [1]           | 1.29 | 4.3E-03 | Diacylglycerol                                               |
| n-palmitoyl-sphinganine (d18:0/16:0)                   | 1.21 | 4.4E-03 | Dihydroceramides                                             |
| 9-hydroxystearate                                      | 1.34 | 4.6E-03 | Fatty Acid, Monohydroxy                                      |
| 1-palmitoleoyl-2-linolenoyl-gpc (16:1/18:3)            | 0.71 | 4.9E-03 | Phosphatidylcholine (PC)                                     |
| deoxycholic acid glucuronide                           | 1.73 | 5.0E-03 | Secondary Bile Acid Metabolism                               |
| docosapentaenoate (dpa; 22:5n3)                        | 1.17 | 5.5E-03 | Long Chain Polyunsaturated Fatty Acid (n3 and n6)            |

|                                                     |      |         |                                                         |
|-----------------------------------------------------|------|---------|---------------------------------------------------------|
| caproate (6:0)                                      | 1.15 | 5.5E-03 | Medium Chain Fatty Acid                                 |
| 2-hydroxystearate                                   | 1.10 | 5.5E-03 | Fatty Acid, Monohydroxy                                 |
| androstenediol (3alpha, 17alpha) monosulfate (3)    | 0.72 | 5.5E-03 | Androgenic Steroids                                     |
| 1-stearoyl-2-oleoyl-gpe (18:0/18:1)                 | 1.15 | 5.7E-03 | Phosphatidylethanolamine (PE)                           |
| pregnen-diol disulfate                              | 0.75 | 6.3E-03 | Pregnenolone Steroids                                   |
| lithocholate sulfate (1)                            | 1.58 | 6.5E-03 | Secondary Bile Acid Metabolism                          |
| adipoylcarnitine (c6-dc)                            | 1.31 | 6.5E-03 | Fatty Acid Metabolism (Acyl Carnitine, Dicarboxylate)   |
| dihomolinolenate (20:3n3 or 3n6)                    | 1.14 | 6.9E-03 | Long Chain Polyunsaturated Fatty Acid (n3 and n6)       |
| behenoyl dihydrosphingomyelin (d18:0/22:0)          | 1.28 | 7.0E-03 | Dihydrosphingomyelins                                   |
| docosapentaenoylcarnitine (c22:5n3)                 | 1.26 | 7.0E-03 | Fatty Acid Metabolism (Acyl Carnitine, Polyunsaturated) |
| taurodeoxycholic acid 3-sulfate                     | 1.70 | 7.1E-03 | Secondary Bile Acid Metabolism                          |
| 5alpha-androstan-3alpha,17beta-diol monosulfate (1) | 1.37 | 7.5E-03 | Androgenic Steroids                                     |
| 11beta-hydroxyandrosterone glucuronide              | 1.30 | 7.6E-03 | Androgenic Steroids                                     |
| hexadecadienoate (16:2n6)                           | 1.17 | 7.6E-03 | Long Chain Polyunsaturated Fatty Acid (n3 and n6)       |
| sphingomyelin (d18:1/22:2, d18:2/22:1, d16:1/24:2)  | 1.12 | 8.1E-03 | Sphingomyelins                                          |
| erucoylcarnitine (c22:1)                            | 1.35 | 8.7E-03 | Fatty Acid Metabolism (Acyl Carnitine, Monounsaturated) |
| sphingadienine                                      | 1.23 | 8.7E-03 | Sphingolipid Synthesis                                  |
| n-palmitoyl-sphingadienine (d18:2/16:0)             | 1.13 | 8.7E-03 | Ceramides                                               |
| 5alpha-androstan-3beta,17beta-diol monosulfate (2)  | 1.31 | 9.6E-03 | Androgenic Steroids                                     |
| 2s,3r-dihydroxybutyrate                             | 1.19 | 9.6E-03 | Fatty Acid, Dihydroxy                                   |
| n-oleoyltaurine                                     | 0.84 | 9.9E-03 | Endocannabinoid                                         |
| undecanoate (11:0)                                  | 1.07 | 1.0E-02 | Medium Chain Fatty Acid                                 |
| 1-linoleoyl-gpi (18:2)                              | 0.86 | 1.0E-02 | Lysophospholipid                                        |
| glycerophosphoglycerol                              | 1.37 | 1.0E-02 | Glycerolipid Metabolism                                 |
| glycoursodeoxycholic acid sulfate (1)               | 1.69 | 1.1E-02 | Secondary Bile Acid Metabolism                          |
| 17alpha-hydroxypregnenolone 3-sulfate               | 0.74 | 1.1E-02 | Pregnenolone Steroids                                   |
| maleate                                             | 1.35 | 1.1E-02 | Fatty Acid, Dicarboxylate                               |
| docosahexaenoylcholine                              | 1.26 | 1.1E-02 | Fatty Acid Metabolism (Acyl Choline)                    |
| lignoceroyl sphingomyelin (d18:1/24:0)              | 0.88 | 1.1E-02 | Sphingomyelins                                          |
| glycocholate                                        | 0.66 | 1.1E-02 | Primary Bile Acid Metabolism                            |
| pregnenediol sulfate (c21h34o5s)                    | 0.80 | 1.1E-02 | Pregnenolone Steroids                                   |
| 1-stearoyl-2-linoleoyl-gpi (18:0/18:2)              | 0.86 | 1.2E-02 | Phosphatidylinositol (PI)                               |
| palmitoyl dihydrosphingomyelin (d18:0/16:0)         | 0.89 | 1.3E-02 | Dihydrosphingomyelins                                   |
| phosphocholine                                      | 1.12 | 1.3E-02 | Phospholipid Metabolism                                 |
| 2-hydroxydecanoate                                  | 0.76 | 1.4E-02 | Fatty Acid, Monohydroxy                                 |
| 3b-hydroxy-5-cholenoic acid                         | 0.74 | 1.4E-02 | Secondary Bile Acid Metabolism                          |
| 1,2-dilinoleoyl-gpe (18:2/18:2)                     | 0.75 | 1.4E-02 | Phosphatidylethanolamine (PE)                           |
| 2-stearoyl-gpe (18:0)                               | 1.12 | 1.4E-02 | Lysophospholipid                                        |
| 3-hydroxyhexanoate                                  | 0.87 | 1.4E-02 | Fatty Acid, Monohydroxy                                 |
| hexanoylcarnitine (c6)                              | 1.17 | 1.5E-02 | Fatty Acid Metabolism (Acyl Carnitine, Medium Chain)    |
| 1-palmitoyl-gpc (16:0)                              | 0.94 | 1.5E-02 | Lysophospholipid                                        |
| 3-hydroxydecanoylcarnitine                          | 0.79 | 1.5E-02 | Fatty Acid Metabolism (Acyl Carnitine, Hydroxy)         |
| propionylglycine (c3)                               | 1.27 | 1.5E-02 | Fatty Acid Metabolism (also BCAA Metabolism)            |
| heptanoate (7:0)                                    | 1.16 | 1.7E-02 | Medium Chain Fatty Acid                                 |
| pregnanediol-3-glucuronide                          | 1.31 | 1.7E-02 | Progesterin Steroids                                    |
| glycochenodeoxycholate                              | 0.70 | 1.8E-02 | Primary Bile Acid Metabolism                            |
| 1-oleoyl-2-linoleoyl-gpe (18:1/18:2)                | 0.84 | 1.8E-02 | Phosphatidylethanolamine (PE)                           |
| 1-(1-enyl-palmitoyl)-2-oleoyl-gpc (p-16:0/18:1)     | 0.90 | 1.8E-02 | Plasmalogen                                             |
| sphingosine 1-phosphate                             | 0.90 | 1.8E-02 | Sphingosines                                            |
| caprate (10:0)                                      | 1.17 | 1.9E-02 | Medium Chain Fatty Acid                                 |
| 1-oleoylglycerol (18:1)                             | 1.19 | 1.9E-02 | Monoacylglycerol                                        |
| 1-palmitoyl-2-oleoyl-gpe (16:0/18:1)                | 1.14 | 1.9E-02 | Phosphatidylethanolamine (PE)                           |
| 3-methyladipate                                     | 1.33 | 2.0E-02 | Fatty Acid, Dicarboxylate                               |
| nervonoylcarnitine (c24:1)                          | 1.17 | 2.2E-02 | Fatty Acid Metabolism (Acyl Carnitine, Monounsaturated) |
| 1-oleoyl-gpe (18:1)                                 | 0.86 | 2.4E-02 | Lysophospholipid                                        |
| 1-arachidonoyl-gpc (20:4)                           | 0.89 | 2.4E-02 | Lysophospholipid                                        |
| 2-methylmalonylcarnitine (c4-dc)                    | 1.12 | 2.4E-02 | Fatty Acid Metabolism (also BCAA Metabolism)            |
| palmitoloelycholine                                 | 1.20 | 2.6E-02 | Fatty Acid Metabolism (Acyl Choline)                    |
| sphingomyelin (d18:1/20:2, d18:2/20:1, d16:1/22:2)  | 1.12 | 2.7E-02 | Sphingomyelins                                          |
| 3beta,7alpha-dihydroxy-5-cholestenoate              | 0.81 | 2.8E-02 | Sterol                                                  |
| beta-sitosterol                                     | 0.77 | 2.8E-02 | Sterol                                                  |
| adrenoylcarnitine (c22:4)                           | 1.19 | 2.8E-02 | Fatty Acid Metabolism (Acyl Carnitine, Polyunsaturated) |
| 2-oleoylglycerol (18:1)                             | 1.23 | 2.9E-02 | Monoacylglycerol                                        |
| 2-hydroxyoctanoate                                  | 1.22 | 2.9E-02 | Fatty Acid, Monohydroxy                                 |
| androsterone glucuronide                            | 1.30 | 2.9E-02 | Androgenic Steroids                                     |
| pregnenolone sulfate                                | 0.75 | 2.9E-02 | Pregnenolone Steroids                                   |

|                                                        |      |         |                                                              |
|--------------------------------------------------------|------|---------|--------------------------------------------------------------|
| 2-hydroxypalmitate                                     | 1.07 | 3.0E-02 | Fatty Acid, Monohydroxy                                      |
| docosadienoate (22:2n6)                                | 0.89 | 3.0E-02 | Long Chain Polyunsaturated Fatty Acid (n3 and n6)            |
| myo-inositol                                           | 0.91 | 3.2E-02 | Inositol Metabolism                                          |
| 5alpha-androstan-3alpha,17alpha-diol monosulfate       | 1.22 | 3.2E-02 | Androgenic Steroids                                          |
| n-acetyl-2-aminooctanoate                              | 1.22 | 3.4E-02 | Fatty Acid, Amino                                            |
| 1-arachidonoyl-gpe (20:4n6)                            | 0.91 | 3.4E-02 | Lysophospholipid                                             |
| pimeloylcarnitine/3-methyladipoylcarnitine (c7-dc)     | 1.22 | 3.5E-02 | Fatty Acid Metabolism (Acyl Carnitine, Dicarboxylate)        |
| 1-palmitoyl-2-linoleoyl-gpe (16:0/18:2)                | 1.12 | 3.6E-02 | Phosphatidylethanolamine (PE)                                |
| 1-oleoyl-2-arachidonoyl-gpe (18:1/20:4)                | 0.87 | 3.6E-02 | Phosphatidylethanolamine (PE)                                |
| 4-cholesten-3-one                                      | 1.09 | 3.9E-02 | Sterol                                                       |
| 1-myristoyl-2-arachidonoyl-gpc (14:0/20:4)             | 1.15 | 4.0E-02 | Phosphatidylcholine (PC)                                     |
| 1-palmitoyl-gpa (16:0)                                 | 1.13 | 4.3E-02 | Lysophospholipid                                             |
| cerotoylcarnitine (c26)                                | 1.16 | 4.3E-02 | Fatty Acid Metabolism (Acyl Carnitine, Long Chain Saturated) |
| 12-hete                                                | 1.22 | 4.4E-02 | Eicosanoid                                                   |
| deoxycholate                                           | 1.20 | 4.5E-02 | Secondary Bile Acid Metabolism                               |
| 1-palmitoyl-2-dihomo-linolenoyl-gpc (16:0/20:3n3 or 6) | 0.95 | 4.6E-02 | Phosphatidylcholine (PC)                                     |
| 1-stearoyl-2-linoleoyl-gpc (18:0/18:2)                 | 0.96 | 4.7E-02 | Phosphatidylcholine (PC)                                     |
| 1-palmitoyl-2-oleoyl-gpi (16:0/18:1)                   | 1.12 | 4.7E-02 | Phosphatidylinositol (PI)                                    |
| glycochenodeoxycholate glucuronide (1)                 | 1.32 | 4.7E-02 | Primary Bile Acid Metabolism                                 |
| glycerol 3-phosphate                                   | 1.10 | 4.8E-02 | Glycerolipid Metabolism                                      |
| dehydroepiandrosterone sulfate (dhea-s)                | 0.85 | 4.8E-02 | Androgenic Steroids                                          |
| glyco-beta-muricholate                                 | 0.73 | 4.9E-02 | Primary Bile Acid Metabolism                                 |
| 2-palmitoylglycerol (16:0)                             | 1.38 | 5.0E-02 | Monoacylglycerol                                             |



**Table S3.** Carbohydrate, cofactor/vitamin, and energy metabolites associated with a vegan (relative to non-vegetarian) dietary pattern at FDR < 0.05 in linear regression models with SmartSVA approach.

| Metabolite                         | Fold Change | FDR      | Subclass                                             | Major Class            |
|------------------------------------|-------------|----------|------------------------------------------------------|------------------------|
| glucuronate                        | 1.33        | <3.9E-05 | Aminosugar Metabolism                                | Carbohydrate           |
| ribitol                            | 1.16        | 7.3E-05  | Pentose Metabolism                                   | Carbohydrate           |
| sucrose                            | 1.62        | 3.3E-04  | Disaccharides and Oligosaccharides                   | Carbohydrate           |
| ribonate                           | 1.14        | 3.6E-04  | Pentose Metabolism                                   | Carbohydrate           |
| erythronate                        | 1.10        | 3.8E-04  | Aminosugar Metabolism                                | Carbohydrate           |
| lactate                            | 1.13        | 2.3E-03  | Glycolysis, Gluconeogenesis, and Pyruvate Metabolism | Carbohydrate           |
| pyruvate                           | 1.25        | 8.1E-03  | Glycolysis, Gluconeogenesis, and Pyruvate Metabolism | Carbohydrate           |
| fructose                           | 1.12        | 2.1E-02  | Fructose, Mannose and Galactose Metabolism           | Carbohydrate           |
| maltose                            | 1.16        | 2.2E-02  | Glycogen Metabolism                                  | Carbohydrate           |
| galactonate                        | 1.63        | 4.6E-02  | Fructose, Mannose and Galactose Metabolism           | Carbohydrate           |
| quinolinate                        | 1.56        | <3.9E-05 | Nicotinate and Nicotinamide Metabolism               | Cofactors and Vitamins |
| carotene diol (1)                  | 0.65        | 6.5E-05  | Vitamin A Metabolism                                 | Cofactors and Vitamins |
| carotene diol (2)                  | 0.60        | 8.0E-05  | Vitamin A Metabolism                                 | Cofactors and Vitamins |
| carotene diol (3)                  | 0.65        | 5.6E-04  | Vitamin A Metabolism                                 | Cofactors and Vitamins |
| threonate                          | 0.79        | 8.4E-04  | Ascorbate and Aldarate Metabolism                    | Cofactors and Vitamins |
| beta-cryptoxanthin                 | 0.40        | 1.0E-03  | Vitamin A Metabolism                                 | Cofactors and Vitamins |
| oxalate (ethanedioate)             | 0.79        | 2.1E-03  | Ascorbate and Aldarate Metabolism                    | Cofactors and Vitamins |
| n1-methyl-2-pyridone-5-carboxamide | 1.42        | 2.5E-03  | Nicotinate and Nicotinamide Metabolism               | Cofactors and Vitamins |
| pantoate                           | 1.38        | 2.8E-03  | Pantothenate and CoA Metabolism                      | Cofactors and Vitamins |
| gulonate                           | 1.16        | 3.8E-03  | Ascorbate and Aldarate Metabolism                    | Cofactors and Vitamins |
| retinol (vitamin a)                | 1.10        | 1.7E-02  | Vitamin A Metabolism                                 | Cofactors and Vitamins |
| retinal                            | 1.22        | 1.7E-02  | Vitamin A Metabolism                                 | Cofactors and Vitamins |
| pyridoxate                         | 0.75        | 2.8E-02  | Vitamin B6 Metabolism                                | Cofactors and Vitamins |
| pyridoxal                          | 0.84        | 3.5E-02  | Vitamin B6 Metabolism                                | Cofactors and Vitamins |
| gamma-tocopherol/beta-tocopherol   | 1.24        | 4.2E-02  | Tocopherol Metabolism                                | Cofactors and Vitamins |
| delta-cehc glucuronide             | 1.26        | 4.7E-02  | Tocopherol Metabolism                                | Cofactors and Vitamins |
| 2-methylcitrate/homocitrate        | 1.31        | <3.9E-05 | TCA Cycle                                            | Energy                 |
| isocitrate                         | 0.73        | 7.5E-05  | TCA Cycle                                            | Energy                 |
| citraconate/glutaconate            | 1.41        | 8.7E-05  | TCA Cycle                                            | Energy                 |
| succinate                          | 1.15        | 5.6E-04  | TCA Cycle                                            | Energy                 |
| citrate                            | 0.83        | 7.8E-04  | TCA Cycle                                            | Energy                 |
| alpha-ketoglutarate                | 1.20        | 3.9E-03  | TCA Cycle                                            | Energy                 |
| aconitate [cis or trans]           | 0.90        | 2.6E-02  | TCA Cycle                                            | Energy                 |

**Table S4.** Nucleotides, partially characterized molecules, and peptides associated with a vegan (relative to non-vegetarian) dietary pattern at FDR < 0.05 in linear regression models with SmartSVA approach.

| Metabolite                                                         | Fold Change | FDR      | Subclass                                             | Major Class             |
|--------------------------------------------------------------------|-------------|----------|------------------------------------------------------|-------------------------|
| n-acetyl-beta-alanine                                              | 1.20        | <3.9E-05 | Pyrimidine Metabolism, Uracil containing             | Nucleotide              |
| beta-alanine                                                       | 1.25        | <3.9E-05 | Pyrimidine Metabolism, Uracil containing             | Nucleotide              |
| adenine                                                            | 1.25        | <3.9E-05 | Purine Metabolism, Adenine containing                | Nucleotide              |
| orotidine                                                          | 1.31        | <3.9E-05 | Pyrimidine Metabolism, Orotate containing            | Nucleotide              |
| xanthosine                                                         | 1.48        | 5.7E-05  | Purine Metabolism, (Hypo)Xanthine/Inosine containing | Nucleotide              |
| n6-carbamoylthreonyladenosine                                      | 1.17        | 5.7E-05  | Purine Metabolism, Adenine containing                | Nucleotide              |
| n2,n2-dimethylguanosine                                            | 1.15        | 7.4E-05  | Purine Metabolism, Guanine containing                | Nucleotide              |
| 3-(3-amino-3-carboxypropyl)uridine                                 | 1.18        | 8.9E-05  | Pyrimidine Metabolism, Uracil containing             | Nucleotide              |
| n1-methylinosine                                                   | 1.20        | 1.0E-04  | Purine Metabolism, (Hypo)Xanthine/Inosine containing | Nucleotide              |
| 7-methylguanine                                                    | 1.12        | 1.7E-04  | Purine Metabolism, Guanine containing                | Nucleotide              |
| 5,6-dihydrothymine                                                 | 1.22        | 3.7E-04  | Pyrimidine Metabolism, Thymine containing            | Nucleotide              |
| pseudouridine                                                      | 1.11        | 5.2E-04  | Pyrimidine Metabolism, Uracil containing             | Nucleotide              |
| urate                                                              | 1.16        | 1.0E-03  | Purine Metabolism, (Hypo)Xanthine/Inosine containing | Nucleotide              |
| uracil                                                             | 1.22        | 1.8E-03  | Pyrimidine Metabolism, Uracil containing             | Nucleotide              |
| hypoxanthine                                                       | 1.27        | 2.8E-03  | Purine Metabolism, (Hypo)Xanthine/Inosine containing | Nucleotide              |
| allantoin                                                          | 1.19        | 3.5E-03  | Purine Metabolism, (Hypo)Xanthine/Inosine containing | Nucleotide              |
| n-carbamoylaspartate                                               | 1.24        | 6.5E-03  | Pyrimidine Metabolism, Orotate containing            | Nucleotide              |
| guanosine                                                          | 1.37        | 6.6E-03  | Purine Metabolism, Guanine containing                | Nucleotide              |
| 1-methyladenosine                                                  | 1.06        | 7.0E-03  | Purine Metabolism, Adenine containing                | Nucleotide              |
| orotate                                                            | 1.12        | 2.0E-02  | Pyrimidine Metabolism, Orotate containing            | Nucleotide              |
| glutamine conjugate of c7h12o2                                     | 1.97        | <3.9E-05 | Partially Characterized Molecules                    | Partially Characterized |
| pentose acid                                                       | 0.62        | 7.7E-05  | Partially Characterized Molecules                    | Partially Characterized |
| carnitine of c10h14o2 (5)                                          | 1.50        | 3.9E-04  | Partially Characterized Molecules                    | Partially Characterized |
| glycine conjugate of c10h12o2                                      | 1.49        | 5.8E-04  | Partially Characterized Molecules                    | Partially Characterized |
| glutamine conjugate of c6h10o2 (2)                                 | 0.62        | 1.2E-03  | Partially Characterized Molecules                    | Partially Characterized |
| branched-chain, straight-chain, or cyclopropyl 10:1 fatty acid (1) | 1.34        | 2.4E-03  | Partially Characterized Molecules                    | Partially Characterized |
| glycine conjugate of c10h14o2 (1)                                  | 1.43        | 4.9E-03  | Partially Characterized Molecules                    | Partially Characterized |
| branched-chain, straight-chain, or cyclopropyl 10:1 fatty acid (3) | 1.37        | 2.1E-02  | Partially Characterized Molecules                    | Partially Characterized |
| gamma-glutamylisoleucine                                           | 1.24        | <3.9E-05 | Gamma-glutamyl Amino Acid                            | Peptide                 |
| phenylacetylglutamate                                              | 1.70        | <3.9E-05 | Acetylated Peptides                                  | Peptide                 |
| gamma-glutamylphenylalanine                                        | 1.24        | <3.9E-05 | Gamma-glutamyl Amino Acid                            | Peptide                 |
| gamma-glutamylleucine                                              | 1.26        | <3.9E-05 | Gamma-glutamyl Amino Acid                            | Peptide                 |
| gamma-glutamylvaline                                               | 1.33        | <3.9E-05 | Gamma-glutamyl Amino Acid                            | Peptide                 |
| gamma-glutamyltyrosine                                             | 1.27        | 5.7E-05  | Gamma-glutamyl Amino Acid                            | Peptide                 |
| 4-hydroxyphenylacetylglutamine                                     | 1.57        | 7.4E-05  | Acetylated Peptides                                  | Peptide                 |
| gamma-glutamylglycine                                              | 0.76        | 9.2E-05  | Gamma-glutamyl Amino Acid                            | Peptide                 |
| phenylacetylcarnitine                                              | 2.38        | 1.0E-04  | Acetylated Peptides                                  | Peptide                 |
| gamma-glutamylglutamine                                            | 0.67        | 1.6E-03  | Gamma-glutamyl Amino Acid                            | Peptide                 |
| gamma-glutamylcitrulline                                           | 0.83        | 2.8E-03  | Gamma-glutamyl Amino Acid                            | Peptide                 |
| hwesasxx                                                           | 1.32        | 5.4E-03  | Polypeptide                                          | Peptide                 |
| gamma-glutamyl-alpha-lysine                                        | 1.12        | 6.6E-03  | Gamma-glutamyl Amino Acid                            | Peptide                 |
| phenylacetylglutamine                                              | 1.33        | 1.3E-02  | Acetylated Peptides                                  | Peptide                 |
| gamma-glutamylthreonine                                            | 1.11        | 1.3E-02  | Gamma-glutamyl Amino Acid                            | Peptide                 |
| gamma-glutamylglutamate                                            | 1.34        | 1.5E-02  | Gamma-glutamyl Amino Acid                            | Peptide                 |
| prolylglycine                                                      | 1.16        | 1.9E-02  | Dipeptide                                            | Peptide                 |
| gamma-glutamylhistidine                                            | 0.91        | 3.4E-02  | Gamma-glutamyl Amino Acid                            | Peptide                 |
| gamma-glutamyltryptophan                                           | 1.07        | 4.6E-02  | Gamma-glutamyl Amino Acid                            | Peptide                 |

**Table S5.** Xenobiotic metabolites associated with a vegan (relative to non-vegetarian) dietary pattern at FDR < 0.05 in linear regression models with SmartSVA approach.

| Metabolite                                       | Fold Change | FDR      | Subclass                       |
|--------------------------------------------------|-------------|----------|--------------------------------|
| saccharin                                        | 2.89        | <3.9E-05 | Food Component/Plant           |
| 1,3,7-trimethylurate                             | 2.07        | <3.9E-05 | Xanthine Metabolism            |
| perfluorooctanoate (pfoa)                        | 1.67        | <3.9E-05 | Chemical                       |
| 3-methyl catechol sulfate (1)                    | 3.11        | <3.9E-05 | Benzoate Metabolism            |
| mannonate                                        | 1.36        | <3.9E-05 | Food Component/Plant           |
| ibuprofen                                        | 3.40        | <3.9E-05 | Drug - Analgesics, Anesthetics |
| 2-hydroxyacetaminophen sulfate                   | 5.41        | <3.9E-05 | Drug - Analgesics, Anesthetics |
| sulfate of piperine metabolite c18h21no3 (3)     | 3.41        | <3.9E-05 | Food Component/Plant           |
| 4-acetaminophen sulfate                          | 9.79        | <3.9E-05 | Drug - Analgesics, Anesthetics |
| 3-methylxanthine                                 | 5.30        | <3.9E-05 | Xanthine Metabolism            |
| glucuronide of piperine metabolite c17h21no3 (4) | 4.06        | <3.9E-05 | Food Component/Plant           |
| sulfate of piperine metabolite c18h21no3 (1)     | 3.89        | <3.9E-05 | Food Component/Plant           |
| glucuronide of piperine metabolite c17h21no3 (5) | 3.63        | <3.9E-05 | Food Component/Plant           |
| 7-methylxanthine                                 | 5.88        | <3.9E-05 | Xanthine Metabolism            |
| theobromine                                      | 23.76       | <3.9E-05 | Xanthine Metabolism            |
| 1,3-dimethylurate                                | 3.15        | <3.9E-05 | Xanthine Metabolism            |
| glucuronide of piperine metabolite c17h21no3 (3) | 3.68        | <3.9E-05 | Food Component/Plant           |
| caffeine                                         | 8.80        | <3.9E-05 | Xanthine Metabolism            |
| perfluorooctanesulfonate (pfos)                  | 3.07        | <3.9E-05 | Chemical                       |
| piperine                                         | 8.56        | <3.9E-05 | Food Component/Plant           |
| 1-methylxanthine                                 | 3.47        | <3.9E-05 | Xanthine Metabolism            |
| 4-acetamidophenol                                | 5.26        | <3.9E-05 | Drug - Analgesics, Anesthetics |
| 5-acetylamino-6-formylamino-3-methyluracil       | 4.96        | <3.9E-05 | Xanthine Metabolism            |
| sulfate of piperine metabolite c16h19no3 (3)     | 4.37        | <3.9E-05 | Food Component/Plant           |
| 1-methylurate                                    | 5.03        | <3.9E-05 | Xanthine Metabolism            |
| sulfate of piperine metabolite c16h19no3 (2)     | 5.14        | <3.9E-05 | Food Component/Plant           |
| 5-acetylamino-6-amino-3-methyluracil             | 26.43       | <3.9E-05 | Xanthine Metabolism            |
| 1,7-dimethylurate                                | 10.59       | <3.9E-05 | Xanthine Metabolism            |
| theophylline                                     | 15.13       | <3.9E-05 | Xanthine Metabolism            |
| paraxanthine                                     | 15.35       | <3.9E-05 | Xanthine Metabolism            |
| 3,5-dichloro-2,6-dihydroxybenzoic acid           | 2.60        | <3.9E-05 | Chemical                       |
| 3-bromo-5-chloro-2,6-dihydroxybenzoic acid       | 4.45        | <3.9E-05 | Chemical                       |
| salicyluric glucuronide                          | 2.58        | 5.6E-05  | Drug - Analgesics, Anesthetics |
| 4-allylcatechol sulfate                          | 0.45        | 6.7E-05  | Benzoate Metabolism            |
| ergothioneine                                    | 0.62        | 7.0E-05  | Food Component/Plant           |
| indolin-2-one                                    | 1.50        | 1.0E-04  | Food Component/Plant           |
| 2-piperidinone                                   | 1.79        | 1.0E-04  | Food Component/Plant           |
| catechol sulfate                                 | 0.57        | 1.2E-04  | Benzoate Metabolism            |
| 6-hydroxyindole sulfate                          | 1.57        | 1.4E-04  | Chemical                       |
| ethyl beta-glucopyranoside                       | 0.36        | 1.5E-04  | Food Component/Plant           |
| stachydrine                                      | 0.44        | 1.6E-04  | Food Component/Plant           |
| gluconate                                        | 1.31        | 1.7E-04  | Food Component/Plant           |
| 4-acetylphenyl sulfate                           | 0.31        | 2.6E-04  | Benzoate Metabolism            |
| methyl glucopyranoside (alpha + beta)            | 0.38        | 2.9E-04  | Food Component/Plant           |
| 3-acetylphenol sulfate                           | 1.53        | 3.1E-04  | Chemical                       |
| homostachydrine                                  | 2.16        | 3.2E-04  | Food Component/Plant           |
| 2,3-dihydroxypyridine                            | 1.54        | 4.4E-04  | Food Component/Plant           |
| 4-ethylphenyl sulfate                            | 0.15        | 5.2E-04  | Benzoate Metabolism            |
| methyl indole-3-acetate                          | 1.74        | 5.7E-04  | Food Component/Plant           |
| histidine betaine (hercynine)                    | 0.66        | 5.7E-04  | Food Component/Plant           |
| 3-indoleglyoxylic acid                           | 1.21        | 1.2E-03  | Food Component/Plant           |
| thymol sulfate                                   | 2.06        | 1.3E-03  | Food Component/Plant           |
| cinnamoylglycine                                 | 0.55        | 1.7E-03  | Food Component/Plant           |
| 4-acetylcatechol sulfate (1)                     | 0.65        | 1.8E-03  | Food Component/Plant           |
| sulfate                                          | 1.12        | 2.1E-03  | Chemical                       |
| 3-methoxycatechol sulfate (2)                    | 0.69        | 2.1E-03  | Benzoate Metabolism            |
| 4-allylphenol sulfate                            | 0.53        | 2.4E-03  | Food Component/Plant           |
| guaiacol sulfate                                 | 0.69        | 2.4E-03  | Benzoate Metabolism            |
| ectoine                                          | 1.79        | 2.4E-03  | Chemical                       |
| 3-formylindole                                   | 1.30        | 2.5E-03  | Food Component/Plant           |
| 2-hydroxyhippurate (salicylurate)                | 1.83        | 2.5E-03  | Benzoate Metabolism            |
| 4-acetamidobenzoate                              | 0.64        | 2.7E-03  | Chemical                       |

|                                          |      |         |                       |
|------------------------------------------|------|---------|-----------------------|
| 4-ethylcatechol sulfate                  | 0.59 | 3.5E-03 | Benzoate Metabolism   |
| p-cresol sulfate                         | 1.49 | 6.0E-03 | Benzoate Metabolism   |
| quininate                                | 2.32 | 6.5E-03 | Food Component/Plant  |
| 3-hydroxyhippurate sulfate               | 1.38 | 9.0E-03 | Benzoate Metabolism   |
| 3-hydroxypyridine sulfate                | 1.50 | 9.4E-03 | Chemical              |
| 2-oxindole-3-acetate                     | 0.62 | 9.8E-03 | Food Component/Plant  |
| daidzein sulfate (2)                     | 0.52 | 9.8E-03 | Food Component/Plant  |
| dihydrocaffeate sulfate (2)              | 0.64 | 9.9E-03 | Food Component/Plant  |
| thioprolin                               | 0.93 | 2.0E-02 | Chemical              |
| 2-acetamidophenol sulfate                | 0.61 | 2.1E-02 | Food Component/Plant  |
| 3-(3-hydroxyphenyl)propionate            | 1.32 | 2.9E-02 | Benzoate Metabolism   |
| alliin                                   | 0.70 | 3.0E-02 | Food Component/Plant  |
| 3-phenylpropionate (hydrocinnamate)      | 0.70 | 3.1E-02 | Benzoate Metabolism   |
| beta-guanidinopropanoate                 | 1.15 | 3.2E-02 | Food Component/Plant  |
| o-sulfo-l-tyrosine                       | 1.09 | 3.4E-02 | Chemical              |
| 2,3-dihydroxyisovalerate                 | 0.76 | 3.4E-02 | Food Component/Plant  |
| salicylate                               | 1.44 | 4.1E-02 | Drug - Topical Agents |
| o-cresol sulfate                         | 1.30 | 4.2E-02 | Benzoate Metabolism   |
| (2,4 or 2,5)-dimethylphenol sulfate      | 1.36 | 4.3E-02 | Food Component/Plant  |
| hippurate                                | 0.73 | 4.4E-02 | Benzoate Metabolism   |
| 4-hydroxyhippurate                       | 1.18 | 4.7E-02 | Benzoate Metabolism   |
| 2,6-dihydroxybenzoic acid                | 0.79 | 4.9E-02 | Drug - Topical Agents |
| 2,2'-methylenebis(6-tert-butyl-p-cresol) | 0.69 | 4.9E-02 | Chemical              |

**Table S6.** Top 40 metabolites positively associated with a vegan dietary pattern at FDR < 0.05 in linear regression analysis without SmartSVA.

| Metabolites                              | Fold Change | FDR      | Subclass                                         | Major Class                       |
|------------------------------------------|-------------|----------|--------------------------------------------------|-----------------------------------|
| 4-ethylphenyl sulfate                    | 6.48        | <1.0E-04 | Benzoate Metabolism                              | Xenobiotics                       |
| s-methylmethionine                       | 5.02        | <1.0E-04 | Methionine, Cysteine, SAM and Taurine Metabolism | Amino Acid                        |
| 4-acetylphenyl sulfate                   | 3.92        | <1.0E-04 | Benzoate Metabolism                              | Xenobiotics                       |
| branched chain 14:0 dicarboxylic acid    | 3.48        | <1.0E-04 | Fatty Acid, Dicarboxylate                        | Lipid                             |
| glycohyocholate                          | 3.12        | <1.0E-04 | Secondary Bile Acid Metabolism                   | Lipid                             |
| ethyl beta-glucopyranoside               | 3.09        | <1.0E-04 | Food Component/Plant                             | Xenobiotics                       |
| methyl glucopyranoside (alpha + beta)    | 2.86        | <1.0E-04 | Food Component/Plant                             | Xenobiotics                       |
| stachydrine                              | 2.73        | 1.4E-03  | Food Component/Plant                             | Xenobiotics                       |
| 4-allylcatechol sulfate                  | 2.47        | 1.5E-03  | Benzoate Metabolism                              | Xenobiotics                       |
| indolepropionate                         | 2.28        | <1.0E-04 | Tryptophan Metabolism                            | Amino Acid                        |
| 1-linoleoyl-2-linolenoyl-gpc (18:2/18:3) | 2.26        | <1.0E-04 | Phosphatidylcholine (PC)                         | Lipid                             |
| beta-cryptoxanthin                       | 2.26        | <1.0E-04 | Vitamin A Metabolism                             | Cofactors and Vitamins            |
| 2-acetamidophenol sulfate                | 2.26        | 5.9E-03  | Food Component/Plant                             | Xenobiotics                       |
| cinnamoylglycine                         | 2.24        | 1.2E-02  | Food Component/Plant                             | Xenobiotics                       |
| n-methylproline                          | 2.23        | 5.9E-03  | Urea cycle; Arginine and Proline Metabolism      | Amino Acid                        |
| glycochenodeoxycholate 3-sulfate         | 2.14        | 9.2E-03  | Primary Bile Acid Metabolism                     | Lipid                             |
| catechol sulfate                         | 2.13        | 4.4E-04  | Benzoate Metabolism                              | Xenobiotics                       |
| daidzein sulfate (2)                     | 2.07        | 2.1E-02  | Food Component/Plant                             | Xenobiotics                       |
| pentose acid                             | 2.04        | 3.7E-04  | Partially Characterized Molecules                | Partially Characterized Molecules |
| dihydrocaffeate sulfate (2)              | 2.03        | 1.3E-02  | Food Component/Plant                             | Xenobiotics                       |
| s-methylcysteine sulfoxide               | 1.99        | <1.0E-04 | Methionine, Cysteine, SAM and Taurine Metabolism | Amino Acid                        |
| n-delta-acetylornithine                  | 1.98        | <1.0E-04 | Urea cycle; Arginine and Proline Metabolism      | Amino Acid                        |
| gentisate                                | 1.98        | 5.3E-04  | Tyrosine Metabolism                              | Amino Acid                        |
| octadecadienedioate (c18:2-dc)           | 1.96        | <1.0E-04 | Fatty Acid, Dicarboxylate                        | Lipid                             |
| glycocholate                             | 1.95        | 4.6E-03  | Primary Bile Acid Metabolism                     | Lipid                             |
| 2-methylserine                           | 1.94        | <1.0E-04 | Glycine, Serine and Threonine Metabolism         | Amino Acid                        |
| n-linoleoylglycine                       | 1.94        | 5.1E-04  | Fatty Acid Metabolism (Acyl Glycine)             | Lipid                             |
| 4-methoxyphenol sulfate                  | 1.93        | 3.4E-03  | Tyrosine Metabolism                              | Amino Acid                        |
| 4-acetylcatechol sulfate (1)             | 1.91        | 4.4E-03  | Food Component/Plant                             | Xenobiotics                       |
| 4-allylphenol sulfate                    | 1.88        | 8.4E-03  | Food Component/Plant                             | Xenobiotics                       |
| chiro-inositol                           | 1.85        | 1.0E-02  | Inositol Metabolism                              | Lipid                             |
| octadecenedioate (c18:1-dc)              | 1.83        | <1.0E-04 | Fatty Acid, Dicarboxylate                        | Lipid                             |
| 1,2-dilinoleoyl-gpe (18:2/18:2)          | 1.81        | 2.3E-03  | Phosphatidylethanolamine (PE)                    | Lipid                             |
| 4-ethylcatechol sulfate                  | 1.80        | 2.4E-02  | Benzoate Metabolism                              | Xenobiotics                       |
| 12,13-dihome                             | 1.80        | <1.0E-04 | Fatty Acid, Dihydroxy                            | Lipid                             |
| glycochenodeoxycholate                   | 1.79        | 6.8E-03  | Primary Bile Acid Metabolism                     | Lipid                             |
| 2-aminophenol sulfate                    | 1.77        | 2.8E-02  | Food Component/Plant                             | Xenobiotics                       |
| hippurate                                | 1.76        | 1.8E-02  | Benzoate Metabolism                              | Xenobiotics                       |
| histidine betaine (hercynine)            | 1.75        | 7.8E-04  | Food Component/Plant                             | Xenobiotics                       |
| 2-oxindole-3-acetate                     | 1.75        | 8.5E-03  | Food Component/Plant                             | Xenobiotics                       |

**Table S7.** Top 40 metabolites inversely associated with a vegan dietary pattern at FDR < 0.05 in linear regression analysis without SmartSVA.

| Metabolites                                                    | Fold Change | FDR      | Subclass                       | Major Class |
|----------------------------------------------------------------|-------------|----------|--------------------------------|-------------|
| theobromine                                                    | 0.05        | <1.0E-04 | Xanthine Metabolism            | Xenobiotics |
| 3-carboxy-4-methyl-5-propyl-2-furanpropanoate (cmpf)           | 0.06        | <1.0E-04 | Fatty Acid, Dicarboxylate      | Lipid       |
| 5-acetylamino-6-amino-3-methyluracil                           | 0.06        | <1.0E-04 | Xanthine Metabolism            | Xenobiotics |
| 3-methylhistidine                                              | 0.07        | <1.0E-04 | Histidine Metabolism           | Amino Acid  |
| 1-methyl-5-imidazoleacetate                                    | 0.09        | <1.0E-04 | Histidine Metabolism           | Amino Acid  |
| paraxanthine                                                   | 0.10        | <1.0E-04 | Xanthine Metabolism            | Xenobiotics |
| theophylline                                                   | 0.10        | <1.0E-04 | Xanthine Metabolism            | Xenobiotics |
| hydroxy-cmpf                                                   | 0.10        | <1.0E-04 | Fatty Acid, Dicarboxylate      | Lipid       |
| piperine                                                       | 0.13        | <1.0E-04 | Food Component/Plant           | Xenobiotics |
| 4-acetaminophen sulfate                                        | 0.14        | 1.3E-02  | Drug - Analgesics, Anesthetics | Xenobiotics |
| 1,7-dimethylurate                                              | 0.14        | <1.0E-04 | Xanthine Metabolism            | Xenobiotics |
| caffeine                                                       | 0.16        | <1.0E-04 | Xanthine Metabolism            | Xenobiotics |
| 4-acetamidophenol                                              | 0.19        | 1.6E-03  | Drug - Analgesics, Anesthetics | Xenobiotics |
| 7-methylxanthine                                               | 0.20        | <1.0E-04 | Xanthine Metabolism            | Xenobiotics |
| sulfate of piperine metabolite c16h19no3 (2)                   | 0.22        | <1.0E-04 | Food Component/Plant           | Xenobiotics |
| 3-methylxanthine                                               | 0.23        | <1.0E-04 | Xanthine Metabolism            | Xenobiotics |
| 3-bromo-5-chloro-2,6-dihydroxybenzoic acid                     | 0.25        | <1.0E-04 | Chemical                       | Xenobiotics |
| 2-hydroxyacetaminophen sulfate                                 | 0.25        | 3.1E-02  | Drug - Analgesics, Anesthetics | Xenobiotics |
| sulfate of piperine metabolite c16h19no3 (3)                   | 0.25        | <1.0E-04 | Food Component/Plant           | Xenobiotics |
| 1-methylurate                                                  | 0.26        | <1.0E-04 | Xanthine Metabolism            | Xenobiotics |
| 5-acetylamino-6-formylamino-3-methyluracil                     | 0.27        | <1.0E-04 | Xanthine Metabolism            | Xenobiotics |
| n,n,n-trimethyl-5-aminovalerate                                | 0.27        | <1.0E-04 | Lysine Metabolism              | Amino Acid  |
| sulfate of piperine metabolite c18h21no3 (1)                   | 0.27        | <1.0E-04 | Food Component/Plant           | Xenobiotics |
| heptenedioate (c7:1-dc)                                        | 0.28        | <1.0E-04 | Fatty Acid, Dicarboxylate      | Lipid       |
| (14 or 15)-methylpalmitate (a17:0 or i17:0)                    | 0.30        | <1.0E-04 | Fatty Acid, Branched           | Lipid       |
| glucuronide of piperine metabolite c17h21no3 (4)               | 0.30        | 2.4E-04  | Food Component/Plant           | Xenobiotics |
| perfluorooctanesulfonate (pfos)                                | 0.31        | <1.0E-04 | Chemical                       | Xenobiotics |
| sulfate of piperine metabolite c18h21no3 (3)                   | 0.31        | <1.0E-04 | Food Component/Plant           | Xenobiotics |
| (12 or 13)-methylmyristate (a15:0 or i15:0)                    | 0.32        | <1.0E-04 | Fatty Acid, Branched           | Lipid       |
| glucuronide of piperine metabolite c17h21no3 (3)               | 0.32        | 1.3E-04  | Food Component/Plant           | Xenobiotics |
| glucuronide of piperine metabolite c17h21no3 (5)               | 0.33        | 1.9E-04  | Food Component/Plant           | Xenobiotics |
| tridecenedioate (c13:1-dc)                                     | 0.35        | <1.0E-04 | Fatty Acid, Dicarboxylate      | Lipid       |
| salicyluric glucuronide                                        | 0.35        | 1.5E-02  | Drug - Analgesics, Anesthetics | Xenobiotics |
| 1-methylxanthine                                               | 0.36        | <1.0E-04 | Xanthine Metabolism            | Xenobiotics |
| 1-margaroylglycerol (17:0)                                     | 0.36        | <1.0E-04 | Monoacylglycerol               | Lipid       |
| sphingomyelin (d18:1/25:0, d19:0/24:1, d20:1/23:0, d19:1/24:0) | 0.39        | <1.0E-04 | Sphingomyelins                 | Lipid       |
| (16 or 17)-methylstearate (a19:0 or i19:0)                     | 0.41        | <1.0E-04 | Fatty Acid, Branched           | Lipid       |
| 1,3-dimethylurate                                              | 0.41        | <1.0E-04 | Xanthine Metabolism            | Xenobiotics |
| 3,5-dichloro-2,6-dihydroxybenzoic acid                         | 0.41        | <1.0E-04 | Chemical                       | Xenobiotics |
| saccharin                                                      | 0.42        | 4.0E-03  | Food Component/Plant           | Xenobiotics |

**Table S8.** Amino acid metabolites associated with a vegan (relative to non-vegetarian) dietary pattern at FDR < 0.05 in linear regression analysis without SmartSVA.

| Metabolites                                     | Fold Change | FDR      | Subclass                                         |
|-------------------------------------------------|-------------|----------|--------------------------------------------------|
| s-methylmethionine                              | 5.02        | <1.0E-04 | Methionine, Cysteine, SAM and Taurine Metabolism |
| indolepropionate                                | 2.28        | <1.0E-04 | Tryptophan Metabolism                            |
| n-methylproline                                 | 2.23        | 5.9E-03  | Urea cycle; Arginine and Proline Metabolism      |
| s-methylcysteine sulfoxide                      | 1.99        | <1.0E-04 | Methionine, Cysteine, SAM and Taurine Metabolism |
| n-delta-acetylornithine                         | 1.98        | <1.0E-04 | Urea cycle; Arginine and Proline Metabolism      |
| gentisate                                       | 1.98        | 5.3E-04  | Tyrosine Metabolism                              |
| 2-methylserine                                  | 1.94        | <1.0E-04 | Glycine, Serine and Threonine Metabolism         |
| 4-methoxyphenol sulfate                         | 1.93        | 3.4E-03  | Tyrosine Metabolism                              |
| 2,3-dihydroxy-2-methylbutyrate                  | 1.69        | <1.0E-04 | Leucine, Isoleucine and Valine Metabolism        |
| tryptophan betaine                              | 1.67        | 2.8E-02  | Tryptophan Metabolism                            |
| n2,n5-diacetylornithine                         | 1.67        | 4.8E-04  | Urea cycle; Arginine and Proline Metabolism      |
| pyroglutamine                                   | 1.64        | <1.0E-04 | Glutamate Metabolism                             |
| s-methylcysteine                                | 1.61        | 4.2E-04  | Methionine, Cysteine, SAM and Taurine Metabolism |
| hypotaurine                                     | 1.40        | 3.2E-03  | Methionine, Cysteine, SAM and Taurine Metabolism |
| 1-ribosyl-imidazoleacetate                      | 1.37        | 3.6E-04  | Histidine Metabolism                             |
| dopamine 3-o-sulfate                            | 1.33        | 3.3E-02  | Tyrosine Metabolism                              |
| n-acetyl glycine                                | 1.30        | 1.3E-02  | Glycine, Serine and Threonine Metabolism         |
| carboxyethyl-gaba                               | 1.27        | 2.2E-03  | Glutamate Metabolism                             |
| glycine                                         | 1.26        | 2.4E-03  | Glycine, Serine and Threonine Metabolism         |
| prolylhydroxyproline                            | 1.25        | 2.2E-02  | Urea cycle; Arginine and Proline Metabolism      |
| asparagine                                      | 1.19        | <1.0E-04 | Alanine and Aspartate Metabolism                 |
| n-acetyl-isoputrescine                          | 1.17        | 3.6E-02  | Polyamine Metabolism                             |
| n-acetylputrescine                              | 1.17        | 4.3E-02  | Polyamine Metabolism                             |
| betaine                                         | 1.17        | 6.4E-03  | Glycine, Serine and Threonine Metabolism         |
| glutamine                                       | 1.16        | 2.2E-02  | Glutamate Metabolism                             |
| 5-methylthioribose                              | 1.09        | 2.9E-02  | Methionine, Cysteine, SAM and Taurine Metabolism |
| isoleucine                                      | 0.94        | 3.6E-02  | Leucine, Isoleucine and Valine Metabolism        |
| cysteine sulfinic acid                          | 0.90        | 1.7E-03  | Methionine, Cysteine, SAM and Taurine Metabolism |
| 5-methylthioadenosine (mta)                     | 0.89        | 2.8E-02  | Polyamine Metabolism                             |
| lysine                                          | 0.89        | 8.0E-03  | Lysine Metabolism                                |
| 2,3-dihydroxy-5-methylthio-4-pentenoate (dmtpa) | 0.88        | 1.9E-02  | Methionine, Cysteine, SAM and Taurine Metabolism |
| kynurenine                                      | 0.87        | 2.1E-02  | Tryptophan Metabolism                            |
| 3-methyl-2-oxobutyrate                          | 0.86        | 4.8E-02  | Leucine, Isoleucine and Valine Metabolism        |
| 5-(galactosylhydroxy)-l-lysine                  | 0.82        | 3.0E-02  | Lysine Metabolism                                |
| valine                                          | 0.81        | 1.4E-02  | Leucine, Isoleucine and Valine Metabolism        |
| kynurenate                                      | 0.80        | 2.2E-02  | Tryptophan Metabolism                            |
| homoarginine                                    | 0.79        | 1.2E-02  | Urea cycle; Arginine and Proline Metabolism      |
| dimethylglycine                                 | 0.79        | 3.5E-02  | Glycine, Serine and Threonine Metabolism         |
| 2-aminobutyrate                                 | 0.78        | 3.0E-04  | Glutathione Metabolism                           |
| hydantoin-5-propionate                          | 0.78        | 3.5E-02  | Histidine Metabolism                             |
| glutamate                                       | 0.78        | 2.8E-02  | Glutamate Metabolism                             |
| 1-carboxyethylphenylalanine                     | 0.77        | 3.4E-02  | Phenylalanine Metabolism                         |
| 3-hydroxyisobutyrate                            | 0.77        | 2.2E-02  | Leucine, Isoleucine and Valine Metabolism        |
| urea                                            | 0.76        | 6.1E-04  | Urea cycle; Arginine and Proline Metabolism      |
| 2-hydroxy-4-(methylthio)butanoic acid           | 0.73        | 2.3E-02  | Methionine, Cysteine, SAM and Taurine Metabolism |
| isovaleryl glycine                              | 0.73        | 4.5E-02  | Leucine, Isoleucine and Valine Metabolism        |
| n2-acetyllysine                                 | 0.72        | 1.9E-02  | Lysine Metabolism                                |
| 1-carboxyethylvaline                            | 0.72        | 2.0E-02  | Leucine, Isoleucine and Valine Metabolism        |
| 3-hydroxy-2-ethylpropionate                     | 0.72        | 2.4E-03  | Leucine, Isoleucine and Valine Metabolism        |
| 2-hydroxyphenylacetate                          | 0.72        | 5.4E-03  | Phenylalanine Metabolism                         |
| 1-carboxyethylisoleucine                        | 0.70        | 2.0E-02  | Leucine, Isoleucine and Valine Metabolism        |
| hydroxyproline                                  | 0.69        | <1.0E-04 | Urea cycle; Arginine and Proline Metabolism      |
| 1-carboxyethyltyrosine                          | 0.69        | 2.5E-02  | Tyrosine Metabolism                              |
| 3-indoxyl sulfate                               | 0.69        | 9.4E-03  | Tryptophan Metabolism                            |
| n-acetylcitrulline                              | 0.68        | 3.4E-02  | Urea cycle; Arginine and Proline Metabolism      |
| n-acetyltyrosine                                | 0.68        | 9.6E-03  | Tyrosine Metabolism                              |
| 8-methoxykynurenate                             | 0.68        | 1.3E-02  | Tryptophan Metabolism                            |
| 2-hydroxybutyrate/2-hydroxyisobutyrate          | 0.68        | 1.0E-03  | Glutathione Metabolism                           |
| isobutyrylcarnitine (c4)                        | 0.67        | 5.4E-03  | Leucine, Isoleucine and Valine Metabolism        |
| glutaryl carnitine (c5-dc)                      | 0.67        | 1.0E-02  | Lysine Metabolism                                |
| indole-3-carboxylate                            | 0.66        | 7.9E-03  | Tryptophan Metabolism                            |
| imidazole propionate                            | 0.66        | 3.2E-02  | Histidine Metabolism                             |

|                                  |      |          |                                             |
|----------------------------------|------|----------|---------------------------------------------|
| n-formylanthranilic acid         | 0.65 | 4.2E-03  | Tryptophan Metabolism                       |
| anthranilate                     | 0.64 | 2.1E-02  | Tryptophan Metabolism                       |
| 1-methylhistidine                | 0.64 | <1.0E-04 | Histidine Metabolism                        |
| isovalerylcarnitine (c5)         | 0.63 | 8.4E-04  | Leucine, Isoleucine and Valine Metabolism   |
| tiglyl carnitine (c5)            | 0.62 | <1.0E-04 | Leucine, Isoleucine and Valine Metabolism   |
| homocitrulline                   | 0.62 | 3.5E-04  | Urea cycle; Arginine and Proline Metabolism |
| n-acetyl-1-methylhistidine       | 0.62 | 7.9E-03  | Histidine Metabolism                        |
| 2-oxoarginine                    | 0.61 | 7.0E-03  | Urea cycle; Arginine and Proline Metabolism |
| 6-oxopiperidine-2-carboxylate    | 0.60 | 2.7E-03  | Lysine Metabolism                           |
| 4-hydroxyglutamate               | 0.60 | 1.2E-02  | Glutamate Metabolism                        |
| beta-hydroxyisovaleroylcarnitine | 0.60 | <1.0E-04 | Leucine, Isoleucine and Valine Metabolism   |
| creatine                         | 0.59 | <1.0E-04 | Creatine Metabolism                         |
| 2-methylbutyrylcarnitine (c5)    | 0.59 | <1.0E-04 | Leucine, Isoleucine and Valine Metabolism   |
| n-carbamoylalanine               | 0.58 | 7.9E-03  | Alanine and Aspartate Metabolism            |
| formiminoglutamate               | 0.55 | <1.0E-04 | Histidine Metabolism                        |
| 2-aminoadipate                   | 0.55 | <1.0E-04 | Lysine Metabolism                           |
| xanthurenate                     | 0.54 | 7.6E-04  | Tryptophan Metabolism                       |
| indoleacetylglutamine            | 0.51 | 3.5E-03  | Tryptophan Metabolism                       |
| n,n,n-trimethyl-5-aminovalerate  | 0.27 | <1.0E-04 | Lysine Metabolism                           |
| 1-methyl-5-imidazoleacetate      | 0.09 | <1.0E-04 | Histidine Metabolism                        |
| 3-methylhistidine                | 0.07 | <1.0E-04 | Histidine Metabolism                        |

---



**Table S9.** Lipid metabolites associated with a vegan (relative to non-vegetarian) dietary pattern at FDR < 0.05 in linear regression analysis without SmartSVA approach.

| Metabolites                                            | Fold Change | FDR      | Subclass                                                |
|--------------------------------------------------------|-------------|----------|---------------------------------------------------------|
| branched chain 14:0 dicarboxylic acid                  | 3.48        | <1.0E-04 | Fatty Acid, Dicarboxylate                               |
| glycohyocholate                                        | 3.12        | <1.0E-04 | Secondary Bile Acid Metabolism                          |
| 1-linoleoyl-2-linolenoyl-gpc (18:2/18:3)               | 2.26        | <1.0E-04 | Phosphatidylcholine (PC)                                |
| glycochenodeoxycholate 3-sulfate                       | 2.14        | 9.2E-03  | Primary Bile Acid Metabolism                            |
| octadecadienedioate (c18:2-dc)                         | 1.96        | <1.0E-04 | Fatty Acid, Dicarboxylate                               |
| glycocholate                                           | 1.95        | 4.6E-03  | Primary Bile Acid Metabolism                            |
| n-linoleoylglycine                                     | 1.94        | 5.1E-04  | Fatty Acid Metabolism (Acyl Glycine)                    |
| chiro-inositol                                         | 1.85        | 1.0E-02  | Inositol Metabolism                                     |
| octadecenedioate (c18:1-dc)                            | 1.83        | <1.0E-04 | Fatty Acid, Dicarboxylate                               |
| 1,2-dilinoeoyl-gpe (18:2/18:2)                         | 1.81        | 2.3E-03  | Phosphatidylethanolamine (PE)                           |
| 12,13-dihome                                           | 1.80        | <1.0E-04 | Fatty Acid, Dihydroxy                                   |
| glycochenodeoxycholate                                 | 1.79        | 6.8E-03  | Primary Bile Acid Metabolism                            |
| dodecenedioate (c12:1-dc)                              | 1.75        | 6.0E-03  | Fatty Acid, Dicarboxylate                               |
| 1-lignoceroyl-gpc (24:0)                               | 1.74        | <1.0E-04 | Lysophospholipid                                        |
| 2-butenoylglycine                                      | 1.73        | 4.1E-03  | Fatty Acid Metabolism (Acyl Glycine)                    |
| 1-cerotoyl-gpc (26:0)                                  | 1.63        | <1.0E-04 | Lysophospholipid                                        |
| trans-2-hexenoylglycine                                | 1.62        | 3.3E-03  | Fatty Acid Metabolism (Acyl Glycine)                    |
| 3-hydroxybutyroylglycine                               | 1.60        | 5.1E-03  | Fatty Acid Metabolism (Acyl Glycine)                    |
| octadecenedioylcarnitine (c18:1-dc)                    | 1.59        | 3.3E-03  | Fatty Acid Metabolism (Acyl Carnitine, Dicarboxylate)   |
| cis-4-decenoate (10:1n6)                               | 1.58        | 1.1E-03  | Medium Chain Fatty Acid                                 |
| 3-hydroxydodecanedioate                                | 1.57        | 2.2E-02  | Fatty Acid, Dicarboxylate                               |
| dodecanedioate (c12)                                   | 1.56        | 6.4E-03  | Fatty Acid, Dicarboxylate                               |
| n-linoleoyltaurine                                     | 1.55        | 6.7E-03  | Endocannabinoid                                         |
| 1-palmitoleoyl-2-linolenoyl-gpc (16:1/18:3)            | 1.53        | 1.1E-02  | Phosphatidylcholine (PC)                                |
| 9,10-dihome                                            | 1.52        | 4.0E-03  | Fatty Acid, Dihydroxy                                   |
| 3-hydroxysebacate                                      | 1.51        | 1.8E-02  | Fatty Acid, Monohydroxy                                 |
| dodecadienoate (12:2)                                  | 1.50        | 5.5E-04  | Fatty Acid, Dicarboxylate                               |
| (2 or 3)-decenoate (10:1n7 or n8)                      | 1.48        | 4.0E-03  | Medium Chain Fatty Acid                                 |
| 2-hydroxysebacate                                      | 1.45        | 6.0E-03  | Fatty Acid, Dicarboxylate                               |
| 1-oleoyl-2-linoleoyl-gpe (18:1/18:2)                   | 1.44        | 6.0E-03  | Phosphatidylethanolamine (PE)                           |
| 1,2-dilinoeoyl-gpc (18:2/18:2)                         | 1.43        | <1.0E-04 | Phosphatidylcholine (PC)                                |
| linolenoylcarnitine (c18:3)                            | 1.42        | 5.0E-04  | Fatty Acid Metabolism (Acyl Carnitine, Polyunsaturated) |
| beta-sitosterol                                        | 1.41        | 1.6E-02  | Sterol                                                  |
| tetradecadienoate (14:2)                               | 1.40        | 1.9E-02  | Long Chain Polyunsaturated Fatty Acid (n3 and n6)       |
| lactosyl-n-nervonoyl-sphingosine (d18:1/24:1)          | 1.40        | <1.0E-04 | Lactosylceramides (LCER)                                |
| linoleoyl-linolenoyl-glycerol (18:2/18:3) [2]          | 1.39        | 4.1E-02  | Diacylglycerol                                          |
| linolenate (18:3n3 or 3n6)                             | 1.39        | 2.9E-02  | Long Chain Polyunsaturated Fatty Acid (n3 and n6)       |
| 17alpha-hydroxypregnenolone 3-sulfate                  | 1.38        | 3.1E-02  | Pregnenolone Steroids                                   |
| glycosyl ceramide (d18:2/24:1, d18:1/24:2)             | 1.37        | 8.8E-04  | Hexosylceramides (HCER)                                 |
| 1-linoleoyl-gpe (18:2)                                 | 1.37        | 2.2E-02  | Lysophospholipid                                        |
| 2-hydroxydecanoate                                     | 1.34        | 1.7E-02  | Fatty Acid, Monohydroxy                                 |
| 2-aminoheptanoate                                      | 1.33        | 1.3E-03  | Fatty Acid, Amino                                       |
| 1-linolenoyl-gpc (18:3)                                | 1.32        | 2.2E-03  | Lysophospholipid                                        |
| 1-oleoyl-gpe (18:1)                                    | 1.30        | 2.2E-02  | Lysophospholipid                                        |
| 1-oleoyl-2-arachidonoyl-gpe (18:1/20:4)                | 1.30        | 1.5E-02  | Phosphatidylethanolamine (PE)                           |
| 1-stearoyl-2-linoleoyl-gpi (18:0/18:2)                 | 1.30        | 2.3E-03  | Phosphatidylinositol (PI)                               |
| 3-hydroxydecanoate                                     | 1.29        | 2.6E-02  | Fatty Acid, Monohydroxy                                 |
| sphingomyelin (d18:2/24:2)                             | 1.28        | 4.6E-04  | Sphingomyelins                                          |
| 1-linoleoyl-gpc (18:2)                                 | 1.27        | 1.8E-02  | Lysophospholipid                                        |
| 1-linoleoyl-gpi (18:2)                                 | 1.26        | 1.7E-02  | Lysophospholipid                                        |
| 1-oleoyl-gpc (18:1)                                    | 1.25        | 1.3E-03  | Lysophospholipid                                        |
| 3beta,7alpha-dihydroxy-5-cholestenoate                 | 1.25        | 4.3E-02  | Sterol                                                  |
| sphingomyelin (d18:2/24:1, d18:1/24:2)                 | 1.23        | <1.0E-04 | Sphingomyelins                                          |
| 1-linoleoyl-2-arachidonoyl-gpc (18:2/20:4n6)           | 1.23        | 6.4E-03  | Phosphatidylcholine (PC)                                |
| malonate                                               | 1.22        | 1.9E-02  | Fatty Acid Synthesis                                    |
| 3beta-hydroxy-5-cholestenoate                          | 1.20        | 2.0E-02  | Sterol                                                  |
| lactosyl-n-palmitoyl-sphingosine (d18:1/16:0)          | 1.20        | 2.6E-03  | Lactosylceramides (LCER)                                |
| 2-hydroxynervonate                                     | 1.20        | 2.8E-02  | Fatty Acid, Monohydroxy                                 |
| myo-inositol                                           | 1.18        | 1.8E-02  | Inositol Metabolism                                     |
| palmitoyl-sphingosine-phosphoethanolamine (d18:1/16:0) | 1.18        | 2.7E-03  | Ceramide PEs                                            |
| lignoceroyl sphingomyelin (d18:1/24:0)                 | 1.16        | 1.3E-02  | Sphingomyelins                                          |

|                                                        |      |          |                                                              |
|--------------------------------------------------------|------|----------|--------------------------------------------------------------|
| sphingosine 1-phosphate                                | 1.16 | 2.2E-02  | Sphingosines                                                 |
| sphingomyelin (d18:1/24:1, d18:2/24:0)                 | 1.14 | 1.4E-03  | Sphingomyelins                                               |
| palmitoyl dihydrosphingomyelin (d18:0/16:0)            | 1.13 | 2.8E-02  | Dihydrosphingomyelins                                        |
| glycerophosphorylcholine (gpc)                         | 1.12 | 2.4E-02  | Phospholipid Metabolism                                      |
| 1-palmitoyl-2-dihomo-linolenoyl-gpc (16:0/20:3n3 or 6) | 1.08 | 2.2E-02  | Phosphatidylcholine (PC)                                     |
| 1-stearoyl-2-linoleoyl-gpc (18:0/18:2)                 | 1.08 | 2.1E-02  | Phosphatidylcholine (PC)                                     |
| sphingomyelin (d18:1/20:0, d16:1/22:0)                 | 0.91 | 2.2E-02  | Sphingomyelins                                               |
| 3,4-dihydroxybutyrate                                  | 0.88 | 2.2E-02  | Fatty Acid, Dihydroxy                                        |
| behenoyl sphingomyelin (d18:1/22:0)                    | 0.86 | 8.6E-03  | Sphingomyelins                                               |
| sphingomyelin (d18:2/21:0, d16:2/23:0)                 | 0.86 | 2.8E-02  | Sphingomyelins                                               |
| 1-palmitoyl-2-docosahexaenoyl-gpc (16:0/22:6)          | 0.85 | 6.9E-03  | Phosphatidylcholine (PC)                                     |
| sphingomyelin (d18:2/14:0, d18:1/14:1)                 | 0.84 | 4.1E-02  | Sphingomyelins                                               |
| 2-hydroxyglutarate                                     | 0.84 | 7.3E-03  | Fatty Acid, Dicarboxylate                                    |
| sphingomyelin (d18:1/18:1, d18:2/18:0)                 | 0.82 | 8.0E-04  | Sphingomyelins                                               |
| stearate (18:0)                                        | 0.82 | 2.7E-02  | Long Chain Saturated Fatty Acid                              |
| 1-(1-enyl-palmitoyl)-gpc (p-16:0)                      | 0.81 | 1.4E-02  | Lysoplasmalogen                                              |
| arachidoylcarnitine (c20)                              | 0.80 | 2.8E-02  | Fatty Acid Metabolism (Acyl Carnitine, Long Chain Saturated) |
| palmitate (16:0)                                       | 0.80 | 3.1E-02  | Long Chain Saturated Fatty Acid                              |
| hexanoylcarnitine (c6)                                 | 0.80 | 2.7E-02  | Fatty Acid Metabolism (Acyl Carnitine, Medium Chain)         |
| palmitoylcarnitine (c16)                               | 0.80 | 4.1E-03  | Fatty Acid Metabolism (Acyl Carnitine, Long Chain Saturated) |
| palmitoyl ethanolamide                                 | 0.80 | 7.4E-03  | Endocannabinoid                                              |
| sphingomyelin (d18:2/18:1)                             | 0.78 | 9.5E-03  | Sphingomyelins                                               |
| 1-stearoyl-2-docosahexaenoyl-gpc (18:0/22:6)           | 0.78 | 5.7E-03  | Phosphatidylcholine (PC)                                     |
| n-behenoyl-sphingadienine (d18:2/22:0)                 | 0.78 | 1.0E-02  | Ceramides                                                    |
| myristoyl dihydrosphingomyelin (d18:0/14:0)            | 0.77 | 5.6E-04  | Dihydrosphingomyelins                                        |
| stearoyl sphingomyelin (d18:1/18:0)                    | 0.77 | <1.0E-04 | Sphingomyelins                                               |
| 1-palmitoyl-2-palmitoleoyl-gpc (16:0/16:1)             | 0.77 | 2.0E-02  | Phosphatidylcholine (PC)                                     |
| stearoylcarnitine (c18)                                | 0.76 | 5.4E-03  | Fatty Acid Metabolism (Acyl Carnitine, Long Chain Saturated) |
| 1-palmitoyl-gpg (16:0)                                 | 0.76 | 4.4E-02  | Lysophospholipid                                             |
| adrenate (22:4n6)                                      | 0.76 | 2.4E-02  | Long Chain Polyunsaturated Fatty Acid (n3 and n6)            |
| 1-palmitoyl-2-docosahexaenoyl-gpc (16:0/22:6)          | 0.75 | 3.7E-02  | Phosphatidylethanolamine (PE)                                |
| n-stearoyltaurine                                      | 0.75 | 1.3E-02  | Endocannabinoid                                              |
| sphingomyelin (d18:2/23:1)                             | 0.75 | <1.0E-04 | Sphingomyelins                                               |
| myristoleate (14:1n5)                                  | 0.75 | 3.2E-02  | Long Chain Monounsaturated Fatty Acid                        |
| carnitine                                              | 0.74 | 1.4E-02  | Carnitine Metabolism                                         |
| ceramide (d18:1/20:0, d16:1/22:0, d20:1/18:0)          | 0.74 | 3.5E-04  | Ceramides                                                    |
| 1-palmitoylglycerol (16:0)                             | 0.74 | 2.6E-02  | Monoacylglycerol                                             |
| cortolone glucuronide (1)                              | 0.74 | 8.7E-03  | Corticosteroids                                              |
| 1-(1-enyl-palmitoyl)-2-arachidonoyl-gpc (p-16:0/20:4)  | 0.73 | <1.0E-04 | Plasmalogen                                                  |
| sphingomyelin (d18:0/20:0, d16:0/22:0)                 | 0.73 | 1.9E-03  | Dihydrosphingomyelins                                        |
| 1-(1-enyl-stearoyl)-2-linoleoyl-gpc (p-18:0/18:2)      | 0.73 | 1.8E-04  | Plasmalogen                                                  |
| erucoylcarnitine (c22:1)                               | 0.73 | 3.5E-02  | Fatty Acid Metabolism (Acyl Carnitine, Monounsaturated)      |
| butyrylcarnitine (c4)                                  | 0.73 | 4.4E-02  | Fatty Acid Metabolism (also BCAA Metabolism)                 |
| 1-pentadecanoylglycerol (15:0)                         | 0.72 | 3.5E-03  | Monoacylglycerol                                             |
| 1-(1-enyl-palmitoyl)-2-linoleoyl-gpc (p-16:0/18:2)     | 0.70 | <1.0E-04 | Plasmalogen                                                  |
| nonanoylcarnitine (c9)                                 | 0.70 | 3.2E-03  | Fatty Acid Metabolism (Acyl Carnitine, Medium Chain)         |
| myristoylcarnitine (c14)                               | 0.70 | 1.6E-03  | Fatty Acid Metabolism (Acyl Carnitine, Long Chain Saturated) |
| sphingomyelin (d18:1/21:0, d17:1/22:0, d16:1/23:0)     | 0.69 | <1.0E-04 | Sphingomyelins                                               |
| trimethylamine n-oxide                                 | 0.69 | 6.1E-04  | Phospholipid Metabolism                                      |
| sphingomyelin (d18:1/14:0, d16:1/16:0)                 | 0.69 | <1.0E-04 | Sphingomyelins                                               |
| palmitoleate (16:1n7)                                  | 0.69 | 2.3E-02  | Long Chain Monounsaturated Fatty Acid                        |
| docosahexaenoate (dha; 22:6n3)                         | 0.68 | 5.8E-03  | Long Chain Polyunsaturated Fatty Acid (n3 and n6)            |
| sphingomyelin (d18:1/17:0, d17:1/18:0, d19:1/16:0)     | 0.67 | <1.0E-04 | Sphingomyelins                                               |
| pentadecanoate (15:0)                                  | 0.67 | <1.0E-04 | Long Chain Saturated Fatty Acid                              |
| 1-docosahexaenoylglycerol (22:6)                       | 0.66 | 2.8E-02  | Monoacylglycerol                                             |
| 1-(1-enyl-stearoyl)-2-oleoyl-gpc (p-18:0/18:1)         | 0.66 | <1.0E-04 | Plasmalogen                                                  |
| 1-stearoyl-2-docosahexaenoyl-gpc (18:0/22:6)           | 0.66 | 7.0E-03  | Phosphatidylethanolamine (PE)                                |
| 1-palmitoleoylglycerol (16:1)                          | 0.66 | 2.8E-02  | Monoacylglycerol                                             |
| sphingomyelin (d17:1/16:0, d18:1/15:0, d16:1/17:0)     | 0.65 | <1.0E-04 | Sphingomyelins                                               |
| 5alpha-androstan-3alpha,17beta-diol monosulfate (1)    | 0.65 | 3.5E-02  | Androgenic Steroids                                          |
| behenate (22:0)                                        | 0.64 | 1.5E-02  | Long Chain Saturated Fatty Acid                              |
| sphingomyelin (d18:1/19:0, d19:1/18:0)                 | 0.64 | <1.0E-04 | Sphingomyelins                                               |

|                                                                |      |          |                                                              |
|----------------------------------------------------------------|------|----------|--------------------------------------------------------------|
| 1-myristoyl-2-palmitoyl-gpc (14:0/16:0)                        | 0.64 | 3.9E-03  | Phosphatidylcholine (PC)                                     |
| 1-(1-enyl-stearoyl)-gpc (p-18:0)                               | 0.64 | <1.0E-04 | Lysoplasmalogen                                              |
| 2r,3r-dihydroxybutyrate                                        | 0.64 | <1.0E-04 | Fatty Acid, Dihydroxy                                        |
| myristate (14:0)                                               | 0.63 | 5.1E-04  | Long Chain Saturated Fatty Acid                              |
| docosapentaenoate (n6 dpa; 22:5n6)                             | 0.63 | 1.2E-03  | Long Chain Polyunsaturated Fatty Acid (n3 and n6)            |
| 1-stearoyl-gpg (18:0)                                          | 0.62 | 2.4E-04  | Lysophospholipid                                             |
| linoleoyl-docosahexaenoyl-glycerol (18:2/22:6) [2]             | 0.61 | 1.7E-02  | Diacylglycerol                                               |
| 1-(1-enyl-palmitoyl)-2-arachidonoyl-gpc (p-16:0/20:4)          | 0.61 | <1.0E-04 | Plasmalogen                                                  |
| margarate (17:0)                                               | 0.61 | 1.3E-04  | Long Chain Saturated Fatty Acid                              |
| n-stearoyl-sphingadienine (d18:2/18:0)                         | 0.60 | 1.9E-04  | Ceramides                                                    |
| glutarate (c5-dc)                                              | 0.60 | 3.3E-03  | Fatty Acid, Dicarboxylate                                    |
| 1-myristoylglycerol (14:0)                                     | 0.59 | 7.9E-03  | Monoacylglycerol                                             |
| propionylcarnitine (c3)                                        | 0.58 | 1.1E-03  | Fatty Acid Metabolism (also BCAA Metabolism)                 |
| picolinoylglycine                                              | 0.58 | <1.0E-04 | Fatty Acid Metabolism (Acyl Glycine)                         |
| sphingomyelin (d18:0/18:0, d19:0/17:0)                         | 0.58 | <1.0E-04 | Dihydrosphingomyelins                                        |
| ceramide (d16:1/24:1, d18:1/22:1)                              | 0.58 | <1.0E-04 | Ceramides                                                    |
| 10-undecenoate (11:1n1)                                        | 0.56 | <1.0E-04 | Medium Chain Fatty Acid                                      |
| sphingomyelin (d17:1/14:0, d16:1/15:0)                         | 0.56 | <1.0E-04 | Sphingomyelins                                               |
| n-stearoyl-sphingosine (d18:1/18:0)                            | 0.56 | <1.0E-04 | Ceramides                                                    |
| docosahexaenoylcarnitine (c22:6)                               | 0.56 | 1.9E-04  | Fatty Acid Metabolism (Acyl Carnitine, Polyunsaturated)      |
| 3-carboxy-4-methyl-5-pentyl-2-furanpropionate (3-cmpfp)        | 0.56 | <1.0E-04 | Fatty Acid, Dicarboxylate                                    |
| 1-(1-enyl-stearoyl)-2-arachidonoyl-gpc (p-18:0/20:4)           | 0.56 | <1.0E-04 | Plasmalogen                                                  |
| 2-hydroxyadipate                                               | 0.56 | 2.2E-03  | Fatty Acid, Dicarboxylate                                    |
| 10-nonadecenoate (19:1n9)                                      | 0.56 | 1.9E-04  | Long Chain Monounsaturated Fatty Acid                        |
| sphingomyelin (d17:2/16:0, d18:2/15:0)                         | 0.55 | <1.0E-04 | Sphingomyelins                                               |
| isoursodeoxycholate                                            | 0.53 | 3.6E-02  | Secondary Bile Acid Metabolism                               |
| ceramide (d18:1/14:0, d16:1/16:0)                              | 0.53 | <1.0E-04 | Ceramides                                                    |
| n-palmitoyl-heptadecasphingosine (d17:1/16:0)                  | 0.49 | <1.0E-04 | Ceramides                                                    |
| 10-heptadecenoate (17:1n7)                                     | 0.49 | <1.0E-04 | Long Chain Monounsaturated Fatty Acid                        |
| n-stearoyl-sphinganine (d18:0/18:0)                            | 0.44 | <1.0E-04 | Dihydroceramides                                             |
| ceramide (d18:1/17:0, d17:1/18:0)                              | 0.43 | <1.0E-04 | Ceramides                                                    |
| undecenoylcarnitine (c11:1)                                    | 0.43 | <1.0E-04 | Fatty Acid Metabolism (Acyl Carnitine, Monounsaturated)      |
| margaroylcarnitine (c17)                                       | 0.43 | <1.0E-04 | Fatty Acid Metabolism (Acyl Carnitine, Long Chain Saturated) |
| (16 or 17)-methylstearate (a19:0 or i19:0)                     | 0.41 | <1.0E-04 | Fatty Acid, Branched                                         |
| sphingomyelin (d18:1/25:0, d19:0/24:1, d20:1/23:0, d19:1/24:0) | 0.39 | <1.0E-04 | Sphingomyelins                                               |
| 1-margaroylglycerol (17:0)                                     | 0.36 | <1.0E-04 | Monoacylglycerol                                             |
| tridecenedioate (c13:1-dc)                                     | 0.35 | <1.0E-04 | Fatty Acid, Dicarboxylate                                    |
| (12 or 13)-methylmyristate (a15:0 or i15:0)                    | 0.32 | <1.0E-04 | Fatty Acid, Branched                                         |
| (14 or 15)-methylpalmitate (a17:0 or i17:0)                    | 0.30 | <1.0E-04 | Fatty Acid, Branched                                         |
| heptenedioate (c7:1-dc)                                        | 0.28 | <1.0E-04 | Fatty Acid, Dicarboxylate                                    |
| hydroxy-cmpf                                                   | 0.10 | <1.0E-04 | Fatty Acid, Dicarboxylate                                    |
| 3-carboxy-4-methyl-5-propyl-2-furanpropanoate (cmpf)           | 0.06 | <1.0E-04 | Fatty Acid, Dicarboxylate                                    |

**Table S10.** Carbohydrate, cofactors/vitamins, energy, nucleotide, partially characterized, and peptide metabolites associated with a vegan dietary pattern in linear regression analysis without SmartSVA.

| Metabolites                                                        | Fold Change | FDR      | Subclass                                             | Major Class             |
|--------------------------------------------------------------------|-------------|----------|------------------------------------------------------|-------------------------|
| ribulonate/xylulonate/lyxonate                                     | 1.25        | 4.3E-02  | Pentose Metabolism                                   | Carbohydrate            |
| glucuronate                                                        | 0.83        | 3.8E-02  | Aminosugar Metabolism                                | Carbohydrate            |
| mannose                                                            | 0.80        | 3.3E-02  | Fructose, Mannose and Galactose Metabolism           | Carbohydrate            |
| pyruvate                                                           | 0.78        | 2.3E-02  | Glycolysis, Gluconeogenesis, and Pyruvate Metabolism | Carbohydrate            |
| beta-cryptoxanthin                                                 | 2.26        | <1.0E-04 | Vitamin A Metabolism                                 | Cofactors and Vitamins  |
| carotene diol (2)                                                  | 1.56        | 4.5E-04  | Vitamin A Metabolism                                 | Cofactors and Vitamins  |
| carotene diol (1)                                                  | 1.47        | 1.1E-03  | Vitamin A Metabolism                                 | Cofactors and Vitamins  |
| carotene diol (3)                                                  | 1.38        | 3.7E-02  | Vitamin A Metabolism                                 | Cofactors and Vitamins  |
| threonate                                                          | 1.30        | 1.1E-03  | Ascorbate and Aldarate Metabolism                    | Cofactors and Vitamins  |
| oxalate (ethanedioate)                                             | 1.30        | 1.9E-03  | Ascorbate and Aldarate Metabolism                    | Cofactors and Vitamins  |
| n1-methyl-2-pyridone-5-carboxamide                                 | 0.73        | 4.3E-02  | Nicotinate and Nicotinamide Metabolism               | Cofactors and Vitamins  |
| quinolinate                                                        | 0.66        | 6.5E-04  | Nicotinate and Nicotinamide Metabolism               | Cofactors and Vitamins  |
| isocitrate                                                         | 1.35        | 9.8E-04  | TCA Cycle                                            | Energy                  |
| citrate                                                            | 1.19        | 2.2E-02  | TCA Cycle                                            | Energy                  |
| alpha-ketoglutarate                                                | 0.81        | 1.4E-02  | TCA Cycle                                            | Energy                  |
| 2-methylcitrate/homocitrate                                        | 0.79        | 4.7E-03  | TCA Cycle                                            | Energy                  |
| cytosine                                                           | 1.55        | 4.3E-02  | Pyrimidine Metabolism, Cytidine containing           | Nucleotide              |
| n2,n2-dimethylguanosine                                            | 0.91        | 4.8E-02  | Purine Metabolism, Guanine containing                | Nucleotide              |
| n-acetyl-beta-alanine                                              | 0.86        | 1.6E-02  | Pyrimidine Metabolism, Uracil containing             | Nucleotide              |
| 5,6-dihydrothymine                                                 | 0.85        | 3.2E-02  | Pyrimidine Metabolism, Thymine containing            | Nucleotide              |
| beta-alanine                                                       | 0.83        | 9.9E-04  | Pyrimidine Metabolism, Uracil containing             | Nucleotide              |
| orotidine                                                          | 0.82        | 1.7E-03  | Pyrimidine Metabolism, Orotate containing            | Nucleotide              |
| pentose acid                                                       | 2.04        | 3.7E-04  | Partially Characterized Molecules                    | Partially Characterized |
| branched-chain, straight-chain, or cyclopropyl 10:1 fatty acid (1) | 0.75        | 2.8E-02  | Partially Characterized Molecules                    | Partially Characterized |
| glutamine conjugate of c7h12o2                                     | 0.50        | 4.7E-03  | Partially Characterized Molecules                    | Partially Characterized |
| gamma-glutamylglycine                                              | 1.40        | <1.0E-04 | Gamma-glutamyl Amino Acid                            | Peptide                 |
| gamma-glutamylglutamine                                            | 1.37        | 2.4E-02  | Gamma-glutamyl Amino Acid                            | Peptide                 |
| gamma-glutamylhistidine                                            | 1.13        | 2.9E-02  | Gamma-glutamyl Amino Acid                            | Peptide                 |
| gamma-glutamylphenylalanine                                        | 0.87        | 4.5E-02  | Gamma-glutamyl Amino Acid                            | Peptide                 |
| gamma-glutamyltyrosine                                             | 0.84        | 2.1E-02  | Gamma-glutamyl Amino Acid                            | Peptide                 |
| gamma-glutamylleucine                                              | 0.84        | 1.0E-02  | Gamma-glutamyl Amino Acid                            | Peptide                 |
| gamma-glutamylvaline                                               | 0.81        | 2.7E-02  | Gamma-glutamyl Amino Acid                            | Peptide                 |
| phenylacetylglutamate                                              | 0.65        | 5.9E-03  | Acetylated Peptides                                  | Peptide                 |
| phenylacetylcarnitine                                              | 0.43        | 1.5E-03  | Acetylated Peptides                                  | Peptide                 |

**Table S11.** Xenobiotic metabolites associated with a vegan (relative to non-vegetarian) dietary pattern at FDR < 0.05 in linear regression analysis without SmartSVA.

| Metabolites                                      | Fold Change | FDR      | Subclass                       |
|--------------------------------------------------|-------------|----------|--------------------------------|
| 4-ethylphenyl sulfate                            | 6.48        | <1.0E-04 | Benzoate Metabolism            |
| 4-acetylphenyl sulfate                           | 3.92        | <1.0E-04 | Benzoate Metabolism            |
| ethyl beta-glucopyranoside                       | 3.09        | <1.0E-04 | Food Component/Plant           |
| methyl glucopyranoside (alpha + beta)            | 2.86        | <1.0E-04 | Food Component/Plant           |
| stachydrine                                      | 2.73        | 1.4E-03  | Food Component/Plant           |
| 4-allylcatechol sulfate                          | 2.47        | 1.5E-03  | Benzoate Metabolism            |
| 2-acetamidophenol sulfate                        | 2.26        | 5.9E-03  | Food Component/Plant           |
| cinnamoylglycine                                 | 2.24        | 1.2E-02  | Food Component/Plant           |
| catechol sulfate                                 | 2.13        | 4.4E-04  | Benzoate Metabolism            |
| daidzein sulfate (2)                             | 2.07        | 2.1E-02  | Food Component/Plant           |
| dihydrocaffeate sulfate (2)                      | 2.03        | 1.3E-02  | Food Component/Plant           |
| 4-acetylcatechol sulfate (1)                     | 1.91        | 4.4E-03  | Food Component/Plant           |
| 4-allylphenol sulfate                            | 1.88        | 8.4E-03  | Food Component/Plant           |
| 4-ethylcatechol sulfate                          | 1.80        | 2.4E-02  | Benzoate Metabolism            |
| 2-aminophenol sulfate                            | 1.77        | 2.8E-02  | Food Component/Plant           |
| hippurate                                        | 1.76        | 1.8E-02  | Benzoate Metabolism            |
| histidine betaine (hercynine)                    | 1.75        | 7.8E-04  | Food Component/Plant           |
| 2-oxindole-3-acetate                             | 1.75        | 8.5E-03  | Food Component/Plant           |
| guaiacol sulfate                                 | 1.74        | 6.7E-03  | Benzoate Metabolism            |
| 2,6-dihydroxybenzoic acid                        | 1.60        | 6.7E-03  | Drug - Topical Agents          |
| 3-methoxycatechol sulfate (2)                    | 1.59        | 5.7E-03  | Benzoate Metabolism            |
| 2,3-dihydroxyisovalerate                         | 1.58        | 2.7E-02  | Food Component/Plant           |
| 4-acetamidobenzoate                              | 1.58        | 8.5E-03  | Chemical                       |
| ergothioneine                                    | 1.57        | 2.3E-03  | Food Component/Plant           |
| tartronate (hydroxymalonate)                     | 1.19        | 3.1E-02  | Food Component/Plant           |
| gluconate                                        | 0.80        | 1.6E-02  | Food Component/Plant           |
| mannonate                                        | 0.78        | 1.3E-03  | Food Component/Plant           |
| indolin-2-one                                    | 0.73        | 2.6E-02  | Food Component/Plant           |
| 2,3-dihydroxypyridine                            | 0.71        | 2.1E-02  | Food Component/Plant           |
| 6-hydroxyindole sulfate                          | 0.71        | 1.7E-02  | Chemical                       |
| methyl indole-3-acetate                          | 0.66        | 2.8E-02  | Food Component/Plant           |
| 2-piperidinone                                   | 0.62        | 5.1E-03  | Food Component/Plant           |
| homostachydrine                                  | 0.61        | 4.0E-02  | Food Component/Plant           |
| perfluorooctanoate (pfoa)                        | 0.59        | <1.0E-04 | Chemical                       |
| 1,3,7-trimethylurate                             | 0.57        | 2.3E-03  | Xanthine Metabolism            |
| 3-methyl catechol sulfate (1)                    | 0.42        | 2.3E-03  | Benzoate Metabolism            |
| saccharin                                        | 0.42        | 4.0E-03  | Food Component/Plant           |
| 3,5-dichloro-2,6-dihydroxybenzoic acid           | 0.41        | <1.0E-04 | Chemical                       |
| 1,3-dimethylurate                                | 0.41        | <1.0E-04 | Xanthine Metabolism            |
| 1-methylxanthine                                 | 0.36        | <1.0E-04 | Xanthine Metabolism            |
| salicyluric glucuronide                          | 0.35        | 1.5E-02  | Drug - Analgesics, Anesthetics |
| glucuronide of piperine metabolite c17h21no3 (5) | 0.33        | 1.9E-04  | Food Component/Plant           |
| glucuronide of piperine metabolite c17h21no3 (3) | 0.32        | 1.3E-04  | Food Component/Plant           |
| sulfate of piperine metabolite c18h21no3 (3)     | 0.31        | <1.0E-04 | Food Component/Plant           |
| perfluorooctanesulfonate (pfos)                  | 0.31        | <1.0E-04 | Chemical                       |
| glucuronide of piperine metabolite c17h21no3 (4) | 0.30        | 2.4E-04  | Food Component/Plant           |
| sulfate of piperine metabolite c18h21no3 (1)     | 0.27        | <1.0E-04 | Food Component/Plant           |
| 5-acetylamino-6-formylamino-3-methyluracil       | 0.27        | <1.0E-04 | Xanthine Metabolism            |
| 1-methylurate                                    | 0.26        | <1.0E-04 | Xanthine Metabolism            |
| sulfate of piperine metabolite c16h19no3 (3)     | 0.25        | <1.0E-04 | Food Component/Plant           |
| 2-hydroxyacetaminophen sulfate                   | 0.25        | 3.1E-02  | Drug - Analgesics, Anesthetics |
| 3-bromo-5-chloro-2,6-dihydroxybenzoic acid       | 0.25        | <1.0E-04 | Chemical                       |
| 3-methylxanthine                                 | 0.23        | <1.0E-04 | Xanthine Metabolism            |
| sulfate of piperine metabolite c16h19no3 (2)     | 0.22        | <1.0E-04 | Food Component/Plant           |
| 7-methylxanthine                                 | 0.20        | <1.0E-04 | Xanthine Metabolism            |
| 4-acetamidophenol                                | 0.19        | 1.6E-03  | Drug - Analgesics, Anesthetics |
| caffeine                                         | 0.16        | <1.0E-04 | Xanthine Metabolism            |
| 1,7-dimethylurate                                | 0.14        | <1.0E-04 | Xanthine Metabolism            |
| 4-acetaminophen sulfate                          | 0.14        | 1.3E-02  | Drug - Analgesics, Anesthetics |
| piperine                                         | 0.13        | <1.0E-04 | Food Component/Plant           |
| theophylline                                     | 0.10        | <1.0E-04 | Xanthine Metabolism            |
| paraxanthine                                     | 0.10        | <1.0E-04 | Xanthine Metabolism            |

|                                      |      |          |                     |
|--------------------------------------|------|----------|---------------------|
| 5-acetylamino-6-amino-3-methyluracil | 0.06 | <1.0E-04 | Xanthine Metabolism |
| theobromine                          | 0.05 | <1.0E-04 | Xanthine Metabolism |

**Table 12.** Metabolite subclasses associated with diet group (vegan vs non-vegetarian) at FDR < 0.05 without SVA method.

| Subclass Labels                                              | Fold Change (95% CI) | FDR      | n significant metabolites | #↑ | #↓ | n total metabolites |
|--------------------------------------------------------------|----------------------|----------|---------------------------|----|----|---------------------|
| Inositol Metabolism                                          | 1.50 (1.19, 1.89)    | 1.5E-02  | 2                         | 0  | 2  | 2                   |
| Vitamin A Metabolism                                         | 1.35 (1.18, 1.54)    | <1.2E-05 | 4                         | 0  | 4  | 6                   |
| Lactosylceramides (LCER)                                     | 1.18 (1.06, 1.32)    | 4.4E-02  | 2                         | 0  | 2  | 3                   |
| Lysophospholipid                                             | 1.15 (1.04, 1.27)    | 4.4E-02  | 10                        | 2  | 8  | 32                  |
| Sterol                                                       | 1.14 (1.04, 1.25)    | 4.6E-02  | 3                         | 0  | 3  | 7                   |
| Alanine and Aspartate Metabolism                             | 0.94 (0.86, 1.02)    | 4.8E-02  | 2                         | 1  | 1  | 9                   |
| Fatty Acid, Dicarboxylate                                    | 0.90 (0.79, 1.03)    | 4.8E-02  | 16                        | 8  | 8  | 34                  |
| Purine Metabolism, Guanine containing                        | 0.88 (0.74, 1.03)    | 4.3E-02  | 1                         | 1  | 0  | 3                   |
| Pyrimidine Metabolism, Orotate containing                    | 0.88 (0.74, 0.99)    | 1.2E-02  | 1                         | 1  | 0  | 4                   |
| Tryptophan Metabolism                                        | 0.88 (0.78, 0.98)    | 7.3E-03  | 11                        | 9  | 2  | 20                  |
| Creatine Metabolism                                          | 0.85 (0.79, 0.92)    | 1.8E-05  | 1                         | 1  | 0  | 3                   |
| Leucine, Isoleucine and Valine Metabolism                    | 0.84 (0.75, 0.95)    | 2.2E-03  | 14                        | 13 | 1  | 32                  |
| Sphingomyelins                                               | 0.84 (0.78, 0.91)    | 1.2E-05  | 20                        | 16 | 4  | 29                  |
| Monoacylglycerol                                             | 0.84 (0.67, 1.04)    | 3.8E-02  | 6                         | 6  | 0  | 17                  |
| Lysine Metabolism                                            | 0.84 (0.76, 0.92)    | 2.0E-04  | 7                         | 7  | 0  | 18                  |
| Chemical                                                     | 0.83 (0.75, 0.93)    | 5.8E-04  | 6                         | 5  | 1  | 20                  |
| Lysoplasmalogen                                              | 0.82 (0.71, 0.94)    | 2.2E-03  | 2                         | 2  | 0  | 4                   |
| Phenylalanine Metabolism                                     | 0.81 (0.69, 0.95)    | 3.6E-03  | 2                         | 2  | 0  | 7                   |
| Plasmalogen                                                  | 0.80 (0.74, 0.86)    | <1.2E-05 | 6                         | 6  | 0  | 11                  |
| Dihydrosphingomyelins                                        | 0.79 (0.69, 0.91)    | 3.5E-04  | 4                         | 3  | 1  | 5                   |
| Carnitine Metabolism                                         | 0.78 (0.62, 1.00)    | 1.7E-02  | 1                         | 1  | 0  | 2                   |
| Long Chain Saturated Fatty Acid                              | 0.75 (0.64, 0.89)    | 3.2E-04  | 6                         | 6  | 0  | 8                   |
| Long Chain Monounsaturated Fatty Acid                        | 0.75 (0.59, 0.94)    | 4.6E-03  | 4                         | 4  | 0  | 7                   |
| Fatty Acid Metabolism (Acyl Carnitine, Long Chain Saturated) | 0.74 (0.64, 0.86)    | 2.9E-05  | 5                         | 5  | 0  | 8                   |
| Ceramides                                                    | 0.66 (0.58, 0.76)    | <1.2E-05 | 8                         | 8  | 0  | 11                  |
| Acetylated Peptides                                          | 0.65 (0.50, 0.85)    | 6.7E-04  | 2                         | 2  | 0  | 4                   |
| Dihydroceramides                                             | 0.63 (0.52, 0.77)    | <1.2E-05 | 1                         | 1  | 0  | 2                   |
| Histidine Metabolism                                         | 0.63 (0.56, 0.71)    | <1.2E-05 | 8                         | 7  | 1  | 15                  |
| Fatty Acid, Branched                                         | 0.34 (0.27, 0.42)    | <1.2E-05 | 3                         | 3  | 0  | 3                   |
| Drug - Analgesics, Anesthetics                               | 0.29 (0.13, 0.61)    | 5.7E-04  | 4                         | 4  | 0  | 5                   |
| Xanthine Metabolism                                          | 0.19 (0.12, 0.30)    | <1.2E-05 | 13                        | 13 | 0  | 13                  |

**Table S13.** Component metabolites of each subclass associated with a vegan (relative to non-vegetarian) dietary pattern at FDR < 0.05.

| Subclass                                          | Metabolites                                                                                                                                                                                                                                                                                                                                                                                                                                                                                                                                                                               |
|---------------------------------------------------|-------------------------------------------------------------------------------------------------------------------------------------------------------------------------------------------------------------------------------------------------------------------------------------------------------------------------------------------------------------------------------------------------------------------------------------------------------------------------------------------------------------------------------------------------------------------------------------------|
| Vitamin A Metabolism                              | beta-cryptoxanthin; carotene diol (2); carotene diol (1); carotene diol (3); retinal; retinol (vitamin a)                                                                                                                                                                                                                                                                                                                                                                                                                                                                                 |
| Ketone Bodies                                     | 3-hydroxybutyrate (bhba); acetoacetate                                                                                                                                                                                                                                                                                                                                                                                                                                                                                                                                                    |
| Inositol Metabolism                               | chiro-inositol; myo-inositol                                                                                                                                                                                                                                                                                                                                                                                                                                                                                                                                                              |
| Fatty Acid Metabolism (Acyl Glycine)              | trans-2-hexenoylglycine; n-linoleoylglycine; 3-hydroxybutyrylglycine; 2-butenoylglycine; picolinoylglycine                                                                                                                                                                                                                                                                                                                                                                                                                                                                                |
| Lactosylceramides (LCER)                          | lactosyl-n-nervonoyl-sphingosine (d18:1/24:1); lactosyl-n-palmitoyl-sphingosine (d18:1/16:0)                                                                                                                                                                                                                                                                                                                                                                                                                                                                                              |
| Benzoate Metabolism                               | 4-ethylphenyl sulfate; 4-acetylphenyl sulfate; catechol sulfate; 4-allylcatechol sulfate; 3-methoxycatechol sulfate (2); guaiacol sulfate; 4-ethylcatechol sulfate; 3-phenylpropionate (hydrocinnamate); hippurate; 4-hydroxyhippurate; o-cresol sulfate; 3-(3-hydroxyphenyl)propionate; 3-hydroxyhippurate sulfate; p-cresol sulfate; 2-hydroxyhippurate (salicylurate); 3-methyl catechol sulfate (1)                                                                                                                                                                                   |
| Aminosugar Metabolism                             | erythronate; glucuronate                                                                                                                                                                                                                                                                                                                                                                                                                                                                                                                                                                  |
| Glutamate Metabolism                              | glutamine; pyroglutamine; carboxyethyl-gaba; alpha-ketoglutarate; beta-citrylglutamate; 4-hydroxyglutamate; n-acetylglutamate; glutamate                                                                                                                                                                                                                                                                                                                                                                                                                                                  |
| Fructose, Mannose and Galactose Metabolism        | galactonate; fructose                                                                                                                                                                                                                                                                                                                                                                                                                                                                                                                                                                     |
| Partially Characterized Molecules                 | pentose acid; glutamine conjugate of c6h10o2 (2); branched-chain, straight-chain, or cyclopropyl 10:1 fatty acid (3); glycine conjugate of c10h14o2 (1); branched-chain, straight-chain, or cyclopropyl 10:1 fatty acid (1); glycine conjugate of c10h12o2; carnitine of c10h14o2 (5); glutamine conjugate of c7h12o2                                                                                                                                                                                                                                                                     |
| Pantothenate and CoA Metabolism                   | pantoate                                                                                                                                                                                                                                                                                                                                                                                                                                                                                                                                                                                  |
| Diacylglycerol                                    | oleoyl-arachidonoyl-glycerol (18:1/20:4) [1]; oleoyl-arachidonoyl-glycerol (18:1/20:4) [2]; linoleoyl-docosahexaenoyl-glycerol (18:2/22:6) [2]; palmitoleoyl-linoleoyl-glycerol (16:1/18:2) [1]; palmitoyl-linoleoyl-glycerol (16:0/18:2) [2]; palmitoyl-linoleoyl-glycerol (16:0/18:2) [1]                                                                                                                                                                                                                                                                                               |
| Urea cycle; Arginine and Proline Metabolism       | n-delta-acetylornithine; n-methylproline; n2,n5-diacetylornithine; prolylhydroxyproline; homoarginine; 3-amino-2-piperidone; proline; n-acetylproline; n-acetylcitrulline; n-acetylariginine; 2-oxoarginine; homocitrulline; urea; hydroxyproline                                                                                                                                                                                                                                                                                                                                         |
| Sphingolipid Synthesis                            | sphingadienine; sphinganine                                                                                                                                                                                                                                                                                                                                                                                                                                                                                                                                                               |
| Fatty Acid, Dicarboxylate                         | 3-hydroxydodecanedioate; octadecenedioate (c18:1-dc); branched chain 14:0 dicarboxylic acid; dodecanedioate (c12:1-dc); dodecadienoate (12:2); octadecadienedioate (c18:2-dc); dodecanedioate (c12); tetradecadienedioate (c14:2-dc); sebacate (c10-dc); 2-hydroxysebacate; hexadecanedioate (c16); 3-hydroxyadipate; 3-methyladipate; maleate; 2-hydroxyglutarate; 2-hydroxyadipate; glutarate (c5-dc); 3-carboxy-4-methyl-5-pentyl-2-furanpropionate (3-cmpfp); hydroxy-cmpf; tridecenedioate (c13:1-dc); 3-carboxy-4-methyl-5-propyl-2-furanpropanoate (cmpf); heptenedioate (c7:1-dc) |
| Tyrosine Metabolism                               | gentisate; 4-methoxyphenol sulfate; tyramine o-sulfate; 4-hydroxyphenylacetatoylcarnitine; vanillactate; 3-(4-hydroxyphenyl)lactate (hpla); n-formylphenylalanine; tyrosine; p-cresol glucuronide; n-acetyltyrosine; 1-carboxyethyl-tyrosine                                                                                                                                                                                                                                                                                                                                              |
| Long Chain Polyunsaturated Fatty Acid (n3 and n6) | tetradecadienoate (14:2); linolenate (18:3n3 or 3n6); docosadienoate (22:2n6); hexadecadienoate (16:2n6); dihomolinolenate (20:3n3 or 3n6); docosapentaenoate (dpa; 22:5n3); nisinatate (24:6n3); docosatrienoate (22:3n6); eicosapentaenoate (epa; 20:5n3); adrenate (22:4n6); docosahexaenoate (dha; 22:6n3); docosapentaenoate (n6 dpa; 22:5n6)                                                                                                                                                                                                                                        |
| Guanidino and Acetamido Metabolism                | 4-guanidinobutanoate; guanidinosuccinate                                                                                                                                                                                                                                                                                                                                                                                                                                                                                                                                                  |
| Secondary Bile Acid Metabolism                    | glycohyocholate; 3b-hydroxy-5-cholenoic acid; deoxycholate; glycooursodeoxycholic acid sulfate (1); taurodeoxycholic acid 3-sulfate; lithocholate sulfate (1); deoxycholic acid glucuronide; taurodeoxycholate; ursodeoxycholate; isoursodeoxycholate; deoxycholic acid 12-sulfate                                                                                                                                                                                                                                                                                                        |
| Fatty Acid Metabolism (also BCAA Metabolism)      | 2-methylmalonylcarnitine (c4-dc); propionylglycine (c3); butyrylcarnitine (c4); propionylcarnitine (c3)                                                                                                                                                                                                                                                                                                                                                                                                                                                                                   |
| Purine Metabolism, Adenine containing             | 1-methyladenosine; n6-carbamoylthreonyladenosine; adenine                                                                                                                                                                                                                                                                                                                                                                                                                                                                                                                                 |
| Phospholipid Metabolism                           | phosphocholine; glycerophosphoethanolamine; choline; trimethylamine n-oxide                                                                                                                                                                                                                                                                                                                                                                                                                                                                                                               |
| Pyrimidine Metabolism, Uracil containing          | uracil; pseudouridine; 3-(3-amino-3-carboxypropyl)uridine; n-acetyl-beta-alanine; beta-alanine                                                                                                                                                                                                                                                                                                                                                                                                                                                                                            |
| Pyrimidine Metabolism, Orotate containing         | orotate; n-carbamoylaspartate; orotidine                                                                                                                                                                                                                                                                                                                                                                                                                                                                                                                                                  |
| Dihydrosphingomyelins                             | palmitoyl dihydrosphingomyelin (d18:0/16:0); behenoyl dihydrosphingomyelin (d18:0/22:0); sphingomyelin (d18:0/20:0, d16:0/22:0); myristoyl dihydrosphingomyelin (d18:0/14:0); sphingomyelin (d18:0/18:0, d19:0/17:0)                                                                                                                                                                                                                                                                                                                                                                      |
| Creatine Metabolism                               | guanidinoacetate; creatinine; creatine                                                                                                                                                                                                                                                                                                                                                                                                                                                                                                                                                    |

|                                                              |                                                                                                                                                                                                                                                                                                                                                                                                                                                                                                                                                                                                                                                                                                                                                                                                                                                                                                                                                                     |
|--------------------------------------------------------------|---------------------------------------------------------------------------------------------------------------------------------------------------------------------------------------------------------------------------------------------------------------------------------------------------------------------------------------------------------------------------------------------------------------------------------------------------------------------------------------------------------------------------------------------------------------------------------------------------------------------------------------------------------------------------------------------------------------------------------------------------------------------------------------------------------------------------------------------------------------------------------------------------------------------------------------------------------------------|
| Alanine and Aspartate Metabolism                             | asparagine; alanine; hydroxyasparagine; n-acetylalanine; n-carbamoylalanine; aspartate                                                                                                                                                                                                                                                                                                                                                                                                                                                                                                                                                                                                                                                                                                                                                                                                                                                                              |
| Glycerolipid Metabolism                                      | glycerol 3-phosphate; glycerophosphoglycerol; glycerol                                                                                                                                                                                                                                                                                                                                                                                                                                                                                                                                                                                                                                                                                                                                                                                                                                                                                                              |
| Purine Metabolism, Guanine containing                        | guanosine; 7-methylguanine; n2,n2-dimethylguanosine                                                                                                                                                                                                                                                                                                                                                                                                                                                                                                                                                                                                                                                                                                                                                                                                                                                                                                                 |
| Purine Metabolism, (Hypo)Xanthine/Inosine containing         | allantoin; hypoxanthine; urate; n1-methylinosine; xanthosine                                                                                                                                                                                                                                                                                                                                                                                                                                                                                                                                                                                                                                                                                                                                                                                                                                                                                                        |
| Acetylated Peptides                                          | phenylacetylglutamine; phenylacetylcarnitine; 4-hydroxyphenylacetylglutamine; phenylacetylglutamate                                                                                                                                                                                                                                                                                                                                                                                                                                                                                                                                                                                                                                                                                                                                                                                                                                                                 |
| Sphingomyelins                                               | sphingomyelin (d18:2/24:1, d18:1/24:2); sphingomyelin (d18:2/24:2); sphingomyelin (d18:1/24:1, d18:2/24:0); lignoceroyl sphingomyelin (d18:1/24:0); sphingomyelin (d18:1/20:2, d18:2/20:1, d16:1/22:2); sphingomyelin (d18:1/22:2, d18:2/22:1, d16:1/24:2); sphingomyelin (d18:1/20:0, d16:1/22:0); sphingomyelin (d18:2/21:0, d16:2/23:0); behenoyl sphingomyelin (d18:1/22:0); sphingomyelin (d18:2/14:0, d18:1/14:1); sphingomyelin (d18:1/18:1, d18:2/18:0); sphingomyelin (d18:2/18:1); stearoyl sphingomyelin (d18:1/18:0); sphingomyelin (d18:2/23:1); sphingomyelin (d18:1/21:0, d17:1/22:0, d16:1/23:0); sphingomyelin (d18:1/19:0, d19:1/18:0); sphingomyelin (d18:1/14:0, d16:1/16:0); sphingomyelin (d18:1/17:0, d17:1/18:0, d19:1/16:0); sphingomyelin (d18:1/25:0, d19:0/24:1, d20:1/23:0, d19:1/24:0); sphingomyelin (d17:1/14:0, d16:1/15:0); sphingomyelin (d17:2/16:0, d18:2/15:0); sphingomyelin (d17:1/16:0, d18:1/15:0, d16:1/17:0)            |
| Dihydroceramides                                             | n-palmitoyl-sphinganine (d18:0/16:0); n-stearoyl-sphinganine (d18:0/18:0)                                                                                                                                                                                                                                                                                                                                                                                                                                                                                                                                                                                                                                                                                                                                                                                                                                                                                           |
| Monoacylglycerol                                             | 2-palmitoylglycerol (16:0); 2-oleoylglycerol (18:1); 1-oleoylglycerol (18:1); 1-dihomo-linolenylglycerol (20:3); 2-palmitoleoylglycerol (16:1); 1-docosahexaenoylglycerol (22:6); 1-palmitoylglycerol (16:0); 1-pentadecanoylglycerol (15:0); 1-palmitoleoylglycerol (16:1); 1-myristoylglycerol (14:0); 1-margaroylglycerol (17:0)                                                                                                                                                                                                                                                                                                                                                                                                                                                                                                                                                                                                                                 |
| Lysine Metabolism                                            | fructosyllsine; 5-hydroxylsine; hydroxy-n6,n6,n6-trimethyllysine; 5-(galactosylhydroxy)-l-lysine; glutaryl carnitine (c5-dc); n2-acetyllysine; lysine; 6-oxopiperidine-2-carboxylate; n6-acetyllysine; 2-aminoadipate; n,n,n-trimethyl-5-aminovaleate                                                                                                                                                                                                                                                                                                                                                                                                                                                                                                                                                                                                                                                                                                               |
| Tryptophan Metabolism                                        | indolepropionate; tryptophan betaine; 6-bromotryptophan; indolebutyrate; indoleacetate; n-acetyltryptophan; 8-methoxykynurenate; indolelactate; kynurenine; c-glycosyltryptophan; 3-indoxyl sulfate; kynurenate; indoleacetylglutamine; n-formylanthranilic acid; indole-3-carboxylate; anthranilate; xanthurenate                                                                                                                                                                                                                                                                                                                                                                                                                                                                                                                                                                                                                                                  |
| Food Component/Plant                                         | methyl glucopyranoside (alpha + beta); ethyl beta-glucopyranoside; ergothioneine; stachydrine; histidine betaine (hercynine); cinnamoylglycine; 4-acetylcatechol sulfate (1); 4-allylphenol sulfate; dihydrocaffeate sulfate (2); daidzein sulfate (2); 2-oxindole-3-acetate; 2-acetamidophenol sulfate; alliin; 2,3-dihydroxyisovalerate; (2,4 or 2,5)-dimethylphenol sulfate; beta-guanidinopropanoate; quinate; 3-formylindole; thymol sulfate; 3-indoleglyoxylic acid; methyl indole-3-acetate; 2,3-dihydroxypyridine; homostachydrine; gluconate; indolin-2-one; 2-piperidinone; saccharin; mannionate; sulfate of piperine metabolite c18h21no3 (3); glucuronide of piperine metabolite c17h21no3 (4); sulfate of piperine metabolite c18h21no3 (1); glucuronide of piperine metabolite c17h21no3 (5); glucuronide of piperine metabolite c17h21no3 (3); piperine; sulfate of piperine metabolite c16h19no3 (3); sulfate of piperine metabolite c16h19no3 (2) |
| Fatty Acid Metabolism (Acyl Carnitine, Long Chain Saturated) | cerotoylcarnitine (c26); behenoylcarnitine (c22); arachidoylcarnitine (c20); lignoceroylcarnitine (c24); stearoylcarnitine (c18); myristoylcarnitine (c14); palmitoylcarnitine (c16); margaroylcarnitine (c17)                                                                                                                                                                                                                                                                                                                                                                                                                                                                                                                                                                                                                                                                                                                                                      |
| Lysoplasmalogen                                              | 1-(1-enyl-oleoyl)-gpe (p-18:1); 1-(1-enyl-palmitoyl)-gpc (p-16:0); 1-(1-enyl-palmitoyl)-gpe (p-16:0); 1-(1-enyl-stearoyl)-gpe (p-18:0)                                                                                                                                                                                                                                                                                                                                                                                                                                                                                                                                                                                                                                                                                                                                                                                                                              |
| Plasmalogen                                                  | 1-(1-enyl-palmitoyl)-2-oleoyl-gpc (p-16:0/18:1); 1-(1-enyl-palmitoyl)-2-arachidonoyl-gpc (p-16:0/20:4); 1-(1-enyl-palmitoyl)-2-linoleoyl-gpe (p-16:0/18:2); 1-(1-enyl-stearoyl)-2-linoleoyl-gpe (p-18:0/18:2); 1-(1-enyl-stearoyl)-2-oleoyl-gpe (p-18:0/18:1); 1-(1-enyl-palmitoyl)-2-arachidonoyl-gpe (p-16:0/20:4); 1-(1-enyl-stearoyl)-2-arachidonoyl-gpe (p-18:0/20:4)                                                                                                                                                                                                                                                                                                                                                                                                                                                                                                                                                                                          |
| Long Chain Monounsaturated Fatty Acid                        | myristoleate (14:1n5); palmitoleate (16:1n7); 10-nonadecenoate (19:1n9); 10-heptadecenoate (17:1n7)                                                                                                                                                                                                                                                                                                                                                                                                                                                                                                                                                                                                                                                                                                                                                                                                                                                                 |
| Ceramides                                                    | n-palmitoyl-sphingadienine (d18:2/16:0); n-palmitoyl-sphingosine (d18:1/16:0); n-behenoyl-sphingadienine (d18:2/22:0); ceramide (d18:1/20:0, d16:1/22:0, d20:1/18:0); n-stearoyl-sphingadienine (d18:2/18:0); ceramide (d16:1/24:1, d18:1/22:1); n-stearoyl-sphingosine (d18:1/18:0); ceramide (d18:1/14:0, d16:1/16:0); ceramide (d18:1/17:0, d17:1/18:0); n-palmitoyl-heptadecasphingosine (d17:1/16:0)                                                                                                                                                                                                                                                                                                                                                                                                                                                                                                                                                           |
| Chemical                                                     | 4-acetamidobenzoate; thioproline; 2,2'-methylenebis(6-tert-butyl-p-cresol); o-sulfo-l-tyrosine; 3-hydroxypyridine sulfate; ectoine; sulfate; 3-acetylphenol sulfate; 6-hydroxyindole sulfate; perfluorooctanoate (pfoa); perfluorooctanesulfonate (pfos); 3,5-dichloro-2,6-dihydroxybenzoic acid; 3-bromo-5-chloro-2,6-dihydroxybenzoic acid                                                                                                                                                                                                                                                                                                                                                                                                                                                                                                                                                                                                                        |
| Leucine, Isoleucine and Valine Metabolism                    | 2,3-dihydroxy-2-methylbutyrate; n-acetylisoleucine; 3-methylglutaryl carnitine (2); alpha-hydroxyisocaproate; 3-hydroxyisobutyrate; isobutyrylglycine (c4); 3-methyl-2-oxobutyrate; alpha-hydroxyisovalerate; 2-hydroxy-3-methylvalerate; isobutyrylcarnitine (c4); leucine; isoleucine; beta-hydroxyisovalerate; isovaleryl carnitine (c5); 3-hydroxy-2-                                                                                                                                                                                                                                                                                                                                                                                                                                                                                                                                                                                                           |



|                                 |                                                                                                                                                                                                                                                                                                                                                                                             |
|---------------------------------|---------------------------------------------------------------------------------------------------------------------------------------------------------------------------------------------------------------------------------------------------------------------------------------------------------------------------------------------------------------------------------------------|
| Long Chain Saturated Fatty Acid | ethylpropionate; isovalerylglycine; valine; 1-carboxyethylleucine; 2-methylbutyryl-carnitine (c5); tiglyl carnitine (c5); beta-hydroxyisovaleroylcarnitine; 1-carboxyethyl-valine; n-acetylvaline; 1-carboxyethylisoleucine                                                                                                                                                                 |
| Phenylalanine Metabolism        | nonadecanoate (19:0); behenate (22:0); stearate (18:0); palmitate (16:0); myristate (14:0); margarate (17:0); pentadecanoate (15:0)                                                                                                                                                                                                                                                         |
| Drug - Analgesics, Anesthetics  | phenylacetate; phenyllactate (pla); phenylalanine; n-acetylphenylalanine; 2-hydroxy-phenylacetate; 1-carboxyethylphenylalanine                                                                                                                                                                                                                                                              |
| Xanthine Metabolism             | salicyluric glucuronide; ibuprofen; 2-hydroxyacetaminophen sulfate; 4-acetaminophen sulfate; 4-acetamidophenol                                                                                                                                                                                                                                                                              |
| Histidine Metabolism            | 1,3,7-trimethylurate; 3-methylxanthine; 7-methylxanthine; theobromine; 1,3-dime-thylurate; caffeine; 1-methylxanthine; 5-acetylamino-6-formylamino-3-methyluracil; 1-methylurate; 5-acetylamino-6-amino-3-methyluracil; 1,7-dimethylurate; theophylline; paraxanthine                                                                                                                       |
| Fatty Acid, Branched            | 1-ribosyl-imidazoleacetate; n-acetylhistidine; n-acetylcarnosine; hydantoin-5-propio-nate; imidazole lactate; n-acetyl-1-methylhistidine; imidazole propionate; formimino-glutamate; 1-methylhistidine; 3-methylhistidine; 1-methyl-5-imidazoleacetate (16 or 17)-methylstearate (a19:0 or i19:0); (12 or 13)-methylmyristate (a15:0 or i15:0); (14 or 15)-methylpalmitate (a17:0 or i17:0) |

**Table S14.** Metabolites differentially abundant (FDR < 0.05) in linear regression analysis with full sample that were nondifferential post cross-validation<sup>1</sup>.

| Metabolite                             | Subclass                                   |
|----------------------------------------|--------------------------------------------|
| hippurate                              | Benzoate Metabolism                        |
| guanidinoacetate                       | Creatine Metabolism                        |
| 2,6-dihydroxybenzoic acid              | Drug - Topical Agents                      |
| glyco-beta-muricholate                 | Primary Bile Acid Metabolism               |
| 2-palmitoylglycerol (16:0)             | Monoacylglycerol                           |
| glycerol 3-phosphate                   | Glycerolipid Metabolism                    |
| glycochenodeoxycholate glucuronide (1) | Primary Bile Acid Metabolism               |
| 4-hydroxyhippurate                     | Benzoate Metabolism                        |
| galactonate                            | Fructose, Mannose and Galactose Metabolism |
| gamma-glutamyltryptophan               | Gamma-glutamyl Amino Acid                  |
| deoxycholate                           | Secondary Bile Acid Metabolism             |
| o-cresol sulfate                       | Benzoate Metabolism                        |
| (2,4 or 2,5)-dimethylphenol sulfate    | Food Component/Plant                       |
| gamma-tocopherol/beta-tocopherol       | Tocopherol Metabolism                      |
| salicylate                             | Drug - Topical Agents                      |

<sup>1</sup>T-scores calculated from residual regression variances obtained from cross-validation for each metabolite.

**Table S15.** Subclasses differential after cross-validation that were not differential in regression analysis with entire sample.

| Pregnenolone Steroids                                   |
|---------------------------------------------------------|
| Fatty Acid Metabolism (Acyl Carnitine, Monounsaturated) |
| Carnitine Metabolism                                    |

**Table 16.** Metabolites or metabolite subclasses showing differential abundance between vegans and non-vegetarians (FDR < 0.05) in > 50% of bootstrapped linear regression analyses, but not differential in non-bootstrapped regression analysis<sup>1</sup>.

| Differential Metabolites (Associated Subclass)     |
|----------------------------------------------------|
| xylose (Pentose Metabolism)                        |
| campesterol (Sterol)                               |
| glycodeoxycholate (Secondary Bile Acid Metabolism) |
| Differential Subclasses                            |
| Pregnenolone Steroids                              |
| Carnitine Metabolism                               |

<sup>1</sup>Assessment of type II error to identify metabolites potentially misclassified as nondifferential. Metabolites differentially abundant in linear regression with full sample compared with metabolites significant in >50% of bootstrap samples.

**Table S17.** Numbers of differential metabolites or metabolite subclasses (at FDR < 0.05) in regression analysis with bootstrap sampling.

| <b>% of bootstrap samples</b> | <b># significant metabolites</b> |
|-------------------------------|----------------------------------|
| 50                            | ≥604                             |
| 70                            | ≥579                             |
| 90                            | ≥538                             |
| 100                           | ≥170                             |
| <b>% of bootstrap samples</b> | <b># significant subclasses</b>  |
| 50                            | ≥49                              |
| 70                            | ≥45                              |
| 90                            | ≥33                              |
| 100                           | ≥12                              |

**Table S18.** List of 129 metabolites showing differential abundance (FDR < 0.05) in at least 90% of bootstrap regressions.

| Metabolite                                              | % of bootstrap samples showing significance |
|---------------------------------------------------------|---------------------------------------------|
| 4-ethylphenyl sulfate                                   | 90                                          |
| octadecenedioate (c18:1-dc)                             | 90                                          |
| dimethylglycine                                         | 90                                          |
| n1-methylinosine                                        | 90                                          |
| 2-oxoarginine                                           | 90                                          |
| 2-hydroxyphenylacetate                                  | 90                                          |
| myristoylcarnitine (c14)                                | 90                                          |
| palmitoylcarnitine (c16)                                | 90                                          |
| gamma-glutamylvaline                                    | 90                                          |
| sulfate of piperine metabolite c18h21no3 (3)            | 90                                          |
| adenine                                                 | 91                                          |
| n-stearoyl-sphingadienine (d18:2/18:0)                  | 91                                          |
| 1,3,7-trimethylurate                                    | 91                                          |
| 1-(1-enyl-palmitoyl)-gpe (p-16:0)                       | 91                                          |
| 1-(1-enyl-palmitoyl)-2-arachidonoyl-gpc (p-16:0/20:4)   | 91                                          |
| 1-linoleoyl-2-linolenoyl-gpc (18:2/18:3)                | 92                                          |
| myristoleate (14:1n5)                                   | 92                                          |
| stearoylcarnitine (c18)                                 | 92                                          |
| gamma-glutamylphenylalanine                             | 92                                          |
| sphingomyelin (d18:2/23:1)                              | 92                                          |
| ceramide (d16:1/24:1, d18:1/22:1)                       | 92                                          |
| palmitoleate (16:1n7)                                   | 92                                          |
| 2-methylbutyrylcarnitine (c5)                           | 92                                          |
| glutamine                                               | 93                                          |
| 2-methylcitrate/homocitrate                             | 93                                          |
| anthranilate                                            | 93                                          |
| perfluorooctanoate (pfoa)                               | 93                                          |
| methionine sulfoxide                                    | 93                                          |
| stearoyl sphingomyelin (d18:1/18:0)                     | 94                                          |
| palmitoyl ethanolamide                                  | 94                                          |
| 1-pentadecanoylglycerol (15:0)                          | 94                                          |
| docosapentaenoate (n6 dpa; 22:5n6)                      | 94                                          |
| stearate (18:0)                                         | 94                                          |
| tiglyl carnitine (c5)                                   | 94                                          |
| beta-cryptoxanthin                                      | 95                                          |
| glycohyocholate                                         | 95                                          |
| sphingomyelin (d18:0/18:0, d19:0/17:0)                  | 95                                          |
| 1-carboxyethylleucine                                   | 95                                          |
| ibuprofen                                               | 95                                          |
| 1-carboxyethyltyrosine                                  | 95                                          |
| homocitrulline                                          | 95                                          |
| 10-undecenoate (11:1n1)                                 | 95                                          |
| sphingomyelin (d18:1/21:0, d17:1/22:0, d16:1/23:0)      | 95                                          |
| sulfate of piperine metabolite c18h21no3 (1)            | 95                                          |
| 3-methyl catechol sulfate (1)                           | 96                                          |
| propionylcarnitine (c3)                                 | 96                                          |
| 1-palmitoleoylglycerol (16:1)                           | 96                                          |
| 6-oxopiperidine-2-carboxylate                           | 96                                          |
| 1-carboxyethylvaline                                    | 96                                          |
| 1-(1-enyl-stearoyl)-2-linoleoyl-gpe (p-18:0/18:2)       | 96                                          |
| n-acetylvaline                                          | 96                                          |
| formiminoglutamate                                      | 96                                          |
| 2-hydroxyacetaminophen sulfate                          | 96                                          |
| 1-stearoyl-gpg (18:0)                                   | 96                                          |
| 3-carboxy-4-methyl-5-pentyl-2-furanpropionate (3-cmpfp) | 96                                          |
| 1-(1-enyl-stearoyl)-2-oleoyl-gpe (p-18:0/18:1)          | 96                                          |
| 1-myristoylglycerol (14:0)                              | 96                                          |
| glucuronide of piperine metabolite c17h21no3 (5)        | 96                                          |
| theobromine                                             | 96                                          |
| 1-lignoceroyl-gpc (24:0)                                | 97                                          |
| creatine                                                | 97                                          |

|                                                                |     |
|----------------------------------------------------------------|-----|
| n-stearoyl-sphinganine (d18:0/18:0)                            | 97  |
| urea                                                           | 97  |
| 1-(1-enyl-palmitoyl)-2-linoleoyl-gpe (p-16:0/18:2)             | 97  |
| n-stearoyl-sphingosine (d18:1/18:0)                            | 97  |
| 3-methylxanthine                                               | 97  |
| 1,3-dimethylurate                                              | 97  |
| gamma-glutamylglutamine                                        | 98  |
| beta-hydroxyisovaleryl carnitine                               | 98  |
| palmitate (16:0)                                               | 98  |
| ceramide (d18:1/14:0, d16:1/16:0)                              | 98  |
| 1-carboxyethylphenylalanine                                    | 98  |
| 1-carboxyethylisoleucine                                       | 98  |
| glucuronide of piperine metabolite c17h21no3 (4)               | 98  |
| 7-methylxanthine                                               | 98  |
| 1-(1-enyl-palmitoyl)-2-arachidonoyl-gpe (p-16:0/20:4)          | 98  |
| 4-acetaminophen sulfate                                        | 99  |
| n6-acetyllysine                                                | 99  |
| glucuronide of piperine metabolite c17h21no3 (3)               | 99  |
| picolinoylglycine                                              | 99  |
| perfluorooctanesulfonate (pfos)                                | 99  |
| 1-methylxanthine                                               | 99  |
| 2-aminoadipate                                                 | 99  |
| 1-methylurate                                                  | 99  |
| 5-acetylamino-6-amino-3-methyluracil                           | 99  |
| 2,3-dihydroxy-5-methylthio-4-pentenoate (dmtpa)                | 100 |
| 2r,3r-dihydroxybutyrate                                        | 100 |
| hydroxyproline                                                 | 100 |
| sphingomyelin (d18:1/19:0, d19:1/18:0)                         | 100 |
| caffeine                                                       | 100 |
| 1-methylhistidine                                              | 100 |
| hydroxy-cmpf                                                   | 100 |
| piperine                                                       | 100 |
| 4-acetamidophenol                                              | 100 |
| 5-acetylamino-6-formylamino-3-methyluracil                     | 100 |
| ceramide (d18:1/17:0, d17:1/18:0)                              | 100 |
| sphingomyelin (d18:1/14:0, d16:1/16:0)                         | 100 |
| 1-(1-enyl-stearoyl)-gpe (p-18:0)                               | 100 |
| myristate (14:0)                                               | 100 |
| sulfate of piperine metabolite c16h19no3 (3)                   | 100 |
| 1-(1-enyl-stearoyl)-2-arachidonoyl-gpe (p-18:0/20:4)           | 100 |
| undecenoylecarnitine (c11:1)                                   | 100 |
| sulfate of piperine metabolite c16h19no3 (2)                   | 100 |
| tridecenedioate (c13:1-dc)                                     | 100 |
| 1-margaroylglycerol (17:0)                                     | 100 |
| sphingomyelin (d18:1/17:0, d17:1/18:0, d19:1/16:0)             | 100 |
| 10-nonadecenoate (19:1n9)                                      | 100 |
| sphingomyelin (d18:1/25:0, d19:0/24:1, d20:1/23:0, d19:1/24:0) | 100 |
| sphingomyelin (d17:1/14:0, d16:1/15:0)                         | 100 |
| n-palmitoyl-heptadecasphingosine (d17:1/16:0)                  | 100 |
| sphingomyelin (d17:2/16:0, d18:2/15:0)                         | 100 |
| 3-carboxy-4-methyl-5-propyl-2-furanpropanoate (cmpf)           | 100 |
| 1,7-dimethylurate                                              | 100 |
| sphingomyelin (d17:1/16:0, d18:1/15:0, d16:1/17:0)             | 100 |
| theophylline                                                   | 100 |
| (16 or 17)-methylstearate (a19:0 or i19:0)                     | 100 |
| paraxanthine                                                   | 100 |
| margarate (17:0)                                               | 100 |
| heptenedioate (c7:1-dc)                                        | 100 |
| 3,5-dichloro-2,6-dihydroxybenzoic acid                         | 100 |
| pentadecanoate (15:0)                                          | 100 |
| 10-heptadecenoate (17:1n7)                                     | 100 |
| (12 or 13)-methylmyristate (a15:0 or i15:0)                    | 100 |
| n,n,n-trimethyl-5-aminovallate                                 | 100 |
| margaroylcarnitine (c17)                                       | 100 |
| 3-methylhistidine                                              | 100 |
| 1-methyl-5-imidazoleacetate                                    | 100 |

|                                             |     |
|---------------------------------------------|-----|
| 3-bromo-5-chloro-2,6-dihydroxybenzoic acid  | 100 |
| (14 or 15)-methylpalmitate (a17:0 or i17:0) | 100 |

**Table S19.** Metabolite subclasses showing differential abundance (FDR < 0.05) in at least 90% of bootstrap regressions.

| Subclass                                                     | % of bootstrap samples showing significance |
|--------------------------------------------------------------|---------------------------------------------|
| Fatty Acid Metabolism (also BCAA Metabolism)                 | 90                                          |
| Phospholipid Metabolism                                      | 91                                          |
| Purine Metabolism, Adenine containing                        | 94                                          |
| Dihydrosphingomyelins                                        | 94                                          |
| Ketone Bodies                                                | 95                                          |
| Vitamin A Metabolism                                         | 97                                          |
| Pyrimidine Metabolism, Uracil containing                     | 97                                          |
| Creatine Metabolism                                          | 97                                          |
| Glycerolipid Metabolism                                      | 97                                          |
| Purine Metabolism, (Hypo)Xanthine/Inosine containing         | 97                                          |
| Alanine and Aspartate Metabolism                             | 98                                          |
| Purine Metabolism, Guanine containing                        | 99                                          |
| Acetylated Peptides                                          | 99                                          |
| Sphingomyelins                                               | 100                                         |
| Dihydroceramides                                             | 100                                         |
| Monoacylglycerol                                             | 100                                         |
| Lysine Metabolism                                            | 100                                         |
| Tryptophan Metabolism                                        | 100                                         |
| Food Component/Plant                                         | 100                                         |
| Fatty Acid Metabolism (Acyl Carnitine, Long Chain Saturated) | 100                                         |
| Lysoplasmalogen                                              | 100                                         |
| Plasmalogen                                                  | 100                                         |
| Long Chain Monounsaturated Fatty Acid                        | 100                                         |
| Ceramides                                                    | 100                                         |
| Chemical                                                     | 100                                         |
| Leucine, Isoleucine and Valine Metabolism                    | 100                                         |
| Long Chain Saturated Fatty Acid                              | 100                                         |
| Phenylalanine Metabolism                                     | 100                                         |
| Drug - Analgesics, Anesthetics                               | 100                                         |
| Xanthine Metabolism                                          | 100                                         |
| Histidine Metabolism                                         | 100                                         |
| Fatty Acid, Branched                                         | 100                                         |

**Table S20.** Top components from principal components analysis and most influential metabolites <sup>1,2</sup>.

| PC  | % Variance Explained | Cumulative % Variance | Metabolites (Loadings > 0.5) <sup>2</sup>                                                                                                                                                                                                                                                                                                                                                                                                                                                                                                                                                                                                                                                                                                                                                                                                                                                                                                                                                                                                                                                                                                                                                                                                                                                                                                                                                                                                                                                                                                                                                                                                                                                                                                                                                                                                                                                                                                                                                                                                                                                                                                                                                                                                                                                                                                                                                                                                                                                                                                                                                                                                                                                                                                                                                                                                                                                                                                                                                                                                                                                                                                                                                                                                                                                                                                                                                                                                                                                                 |
|-----|----------------------|-----------------------|-----------------------------------------------------------------------------------------------------------------------------------------------------------------------------------------------------------------------------------------------------------------------------------------------------------------------------------------------------------------------------------------------------------------------------------------------------------------------------------------------------------------------------------------------------------------------------------------------------------------------------------------------------------------------------------------------------------------------------------------------------------------------------------------------------------------------------------------------------------------------------------------------------------------------------------------------------------------------------------------------------------------------------------------------------------------------------------------------------------------------------------------------------------------------------------------------------------------------------------------------------------------------------------------------------------------------------------------------------------------------------------------------------------------------------------------------------------------------------------------------------------------------------------------------------------------------------------------------------------------------------------------------------------------------------------------------------------------------------------------------------------------------------------------------------------------------------------------------------------------------------------------------------------------------------------------------------------------------------------------------------------------------------------------------------------------------------------------------------------------------------------------------------------------------------------------------------------------------------------------------------------------------------------------------------------------------------------------------------------------------------------------------------------------------------------------------------------------------------------------------------------------------------------------------------------------------------------------------------------------------------------------------------------------------------------------------------------------------------------------------------------------------------------------------------------------------------------------------------------------------------------------------------------------------------------------------------------------------------------------------------------------------------------------------------------------------------------------------------------------------------------------------------------------------------------------------------------------------------------------------------------------------------------------------------------------------------------------------------------------------------------------------------------------------------------------------------------------------------------------------------------|
| PC1 | 10.96                | 10.96                 | margaroylcarnitine (c17), (14 or 15)-methylpalmitate (a17:0 or i17:0), pentadecanoate (15:0), n-palmitoyl-heptadecaspingosine (d17:1/16:0), palmitoylcarnitine (c16), ceramide (d18:1/17:0, d17:1/18:0), (12 or 13)-methylmyristate (a15:0 or i15:0), 1-stearoyl-gpg (18:0), myristate (14:0), 1-methylhistidine, stearoylcarnitine (c18), 10-heptadecenoate (17:1n7), margarate (17:0), heptenedioate (c7:1-dc), n-stearoyl-sphingosine (d18:1/18:0), ceramide (d18:1/20:0, d16:1/22:0, d20:1/18:0), gamma-glutamylvaline, valine, myristoylcarnitine (c14), tridecenedioate (c13:1-dc), n-stearoyl-sphinganine (d18:0/18:0), sphingomyelin (d17:2/16:0, d18:2/15:0), n-stearoyl-sphingadienine (d18:2/18:0), 10-nonadecenoate (19:1n9), n-behenoyl-sphingadienine (d18:2/22:0), palmitoyl ethanolamide, 1-carboxyethylleucine, (16 or 17)-methylstearate (a19:0 or i19:0), 1-margaroylglycerol (17:0), palmitoyl-linoleoylglycerol (16:0/18:2) [2], palmitoyl-linoleoyl-glycerol (16:0/18:2) [1], 1-palmitoylglycerol (16:0), n,n,n-trimethyl-5-aminovalerate, sphingomyelin (d18:1/21:0, d17:1/22:0, d16:1/23:0), ceramide (d18:1/14:0, d16:1/16:0), 2r,3r-dihydroxybutyrate, 3-methylhistidine, 1-(1-enyl-stearoyl)-gpe (p-18:0), 2,3-dihydroxy-5-methylthio-4-pentenoate (dmtpa), 1-myristoylglycerol (14:0), picolinoylglycine, 3-bromo-5-chloro-2,6-dihydroxybenzoic acid, 3,5-dichloro-2,6-dihydroxybenzoic acid, 1,7-dimethylurate, 1-carboxyethylvaline, palmitate (16:0), 1-methyl-5-imidazoleacetate, theophylline, sphingomyelin (d18:1/19:0, d19:1/18:0), cortolone glucuronide (1), 1-(1-enyl-stearoyl)-2-arachidonoyl-gpe (p-18:0/20:4), gamma-glutamylleucine, stearate (18:0), sphingomyelin (d18:1/25:0, d19:0/24:1, d20:1/23:0, d19:1/24:0), 8-methoxykynurenate, sphingomyelin (d18:1/14:0, d16:1/16:0), undecenoylcarnitine (c11:1), n-acetylvaline, formiminoglutamate, 1-pentadecanoylglycerol (15:0), 1-(1-enyl-palmitoyl)-gpe (p-16:0), stearoyl ethanolamide, docosapentaenoate (n6 dpa; 22:5n6), sphingomyelin (d17:1/14:0, d16:1/15:0), ceramide (d16:1/24:1, d18:1/22:1), 1-methylurate, 1-carboxyethylisoleucine, 1-methylxanthine, sphinganine, n6-acetyllysine, n6-carbamoylthreonyladenosine, 5-acetylamino-6-amino-3-methyluracil, 1-arachidonoylglycerol (20:4), homocitrulline, alpha-hydroxyisocaproate, oleoyl-arachidonoyl-glycerol (18:1/20:4) [2], 1,3,7-trimethylurate, caffeine, s-adenosylhomocysteine (sah), sphingosine, alpha-hydroxyisovalerate, n-stearoyltaurine, gamma-glutamylphenylalanine, 3-carboxy-4-methyl-5-pentyl-2-furanpropionate (3-cmpfp), n1-methylinosine, n2,n2-dimethylguanosine, behenoyl dihydrosphingomyelin (d18:0/22:0), theobromine, paraxanthine, glycerol, 1,3-dimethylurate, c-glycosyltryptophan, 1-carboxyethylphenylalanine, gamma-glutamylisoleucine, xanthurenate, 3-(3-amino-3-carboxypropyl)uridine, kynurenate, isovalerylcarnitine (c5), 4-hydroxyglutamate, n-acetyl-beta-alanine, glutamate, tiglyl carnitine (c5), adrenate (22:4n6), lysine, urate, sphingomyelin (d18:0/20:0, d16:0/22:0), leucine, palmitoleate (16:1n7), 2-stearoyl-gpe (18:0), 5-methylthioadenosine (mta), 1-(1-enyl-palmitoyl)-2-arachidonoyl-gpe (p-16:0/20:4), 1-arachidonoyl-gpi (20:4), uridine, hydroxyproline, xanthosine, sphingomyelin (d17:1/16:0, d18:1/15:0, d16:1/17:0), isoleucine, urea, 1-dihomo-linolenylglycerol (20:3), sphingomyelin (d18:0/18:0, d19:0/17:0), beta-cryptoxanthin, glycohyocholate, s-methylmethionine |
| PC2 | 8.12                 | 19.08                 | arabonate/xylonate, guaiacol sulfate, pentose acid, erythronate, erythritol, ascorbic acid 3-sulfate, 1-ribosyl-imidazoleacetate, 2,3-dihydroxyisovalerate, ribulonate/xylulonate/lyxonate, myo-inositol, arabitol/xylitol, 4-acetamidobutanoate, n2,n5-diacetylornithine, vanillic acid glycine, pantoate, dopamine 3-o-sulfate, 2,3-dihydroxy-5-methylthio-4-pentenoate (dmtpa), 3-acetylphenol sulfate, citrulline, catechol sulfate, pseudouridine, 4-acetyl-catechol sulfate (1), n-acetylthreonine, lanthionine, dopamine 4-sulfate, gulonate, hydroxy-n6,n6,n6-trimethyllysine, gamma-glutamylisoleucine, n6-succinyladenosine, 3-indoleglyoxylic acid, vanillactate, 3-(3-amino-3-carboxypropyl)uridine, creatinine, n,n,n-trimethyl-alanylproline betaine (tmap), 4-hydroxyphenylacetylglutamine, citraconate/glutaconate, o-cresol sulfate, 5-methylthioribose, methionine sulfone, alpha-ketoglutaramate, pyrraline, hydroxyasparagine, dihydrocaffeate sulfate (2), n1-methylinosine, indolelactate, trigonelline (n'-methylnicotinate), 4-guanidinobutanoate, histidine betaine (hercynine), 3-(3-hydroxyphenyl)propionate sulfate, 3-hydroxyhippurate, n-delta-acetylornithine, mannitol/sorbitol, 2-methylmalonylcarnitine (c4-dc), 3-hydroxy-3-methylglutarate, n6-carbamoylthreonyladenosine, 2,6-dihydroxybenzoic acid, 5,6-dihydrouridine, 2,3-dihydroxy-2-methylbutyrate, cytosine, ribonate, 3-amino-2-piperidone, 3-hydroxyhippurate sulfate, homovanillate (hva), ascorbic acid 2-sulfate, 4-hydroxyhippurate, 1,2-dilinoyleoyl-gpe (18:2/18:2), ornithine, 2-aminophenol sulfate, vanillylmandelate (vma), 3-hydroxy-2-methylpyridine sulfate, n-formylmethionine, gamma-glutamylphenylalanine, 3-methoxycatechol sulfate (2), sphingomyelin (d18:0/18:0, d19:0/17:0)                                                                                                                                                                                                                                                                                                                                                                                                                                                                                                                                                                                                                                                                                                                                                                                                                                                                                                                                                                                                                                                                                                                                                                                                                                                                                                                                                                                                                                                                                                                                                                                                                                                                                                             |
| PC3 | 7.82                 | 26.9                  | tetradecadienoate (14:2), linoleate (18:2n6), docosadienoate (22:2n6), dihomolinoleate (20:2n6), trans-2-hex-enoylglycine, eicosenoate (20:1n9 or 1n11), linolenate (18:3n3 or 3n6), dodecadienoate (12:2), 3-hydroxydodecadienoate, 3-hydroxydecanoate, dodecenedioate (c12:1-dc), oleate/vaccenate (18:1), n-oleoyltaurine, tetradecadienedioate (c14:2-dc), (2 or 3)-decenoate (10:1n7 or n8), 16-hydroxypalmitate, glutamine conjugate of c6h10o2 (2), 3-hydroxylaurate, hexadecanedioate (c16), 3-hydroxysebacate, arachidate (20:0), n-oleoylserine, hexanoylglycine, erucate (22:1n9), cis-4-decenoate (10:1n6), octadecenedioate (c18:1-dc), oleoyl ethanolamide, 3-hydroxyoctanoate, hexadecadienoate (16:2n6), octadecanedioate (c18), dodecanedioate (c12), malate, citrate, 13-hode + 9-hode, 3-hydroxyhexanoate, linoleoyl ethanolamide, tetradecanedioate (c14), docosatrienoate (22:3n3), 3-hydroxybutyrate (bhba), n-linoleoyltaurine, 3beta-hydroxy-5-cholestenoate, nonadecanoate (19:0), 5-dodecenoate (12:1n7), branched-chain, straight-chain, or cyclopropyl 12:1 fatty acid, 2-hydroxypalmitate, 1-linoleoyl-gpi (18:2), 3-hydroxybutyrylglycine, docosapentaenoate (dpa; 22:5n3), 2-butenoylglycine, n-linoleoylglycine, dihomolinolenate (20:3n3 or 3n6), palmitate (16:0), n-palmitoylglycine, 2-hydroxynervonate, stearate (18:0), 3-hydroxymyristate, glycerol, succinate, aconitate [cis or trans], hexadecenedioate (c16:1-dc), glutamine conjugate of c6h10o2 (1), 4-chlorobenzoic acid, 12,13-dihome, palmitoleoylcarnitine (c16:1), 1-(1-enyl-stearoyl)-2-arachidonoyl-gpe (p-18:0/20:4), 1-methylurate, propionylcarnitine (c3), 5-acetylamino-6-amino-3-methyluracil,                                                                                                                                                                                                                                                                                                                                                                                                                                                                                                                                                                                                                                                                                                                                                                                                                                                                                                                                                                                                                                                                                                                                                                                                                                                                                                                                                                                                                                                                                                                                                                                                                                                                                                                                                                                                  |

|     |      |       |                                                                                                                                                                                                                                                                                                                                                                                                                                                                                                                                                                                                                                                                                                                                                                                                                                                                                                                                                                                                                                                                                                                                                                                                                                                                                                                                                                                                                                                                          |
|-----|------|-------|--------------------------------------------------------------------------------------------------------------------------------------------------------------------------------------------------------------------------------------------------------------------------------------------------------------------------------------------------------------------------------------------------------------------------------------------------------------------------------------------------------------------------------------------------------------------------------------------------------------------------------------------------------------------------------------------------------------------------------------------------------------------------------------------------------------------------------------------------------------------------------------------------------------------------------------------------------------------------------------------------------------------------------------------------------------------------------------------------------------------------------------------------------------------------------------------------------------------------------------------------------------------------------------------------------------------------------------------------------------------------------------------------------------------------------------------------------------------------|
|     |      |       | mannose, sulfate of piperine metabolite c18h21no3 (1), glutarylcarntine (c5-dc), sulfate of piperine metabolite c18h21no3 (3), 7-methylxanthine, sulfate of piperine metabolite c16h19no3 (2), sulfate of piperine metabolite c16h19no3 (3), 1-(1-enyl-palmitoyl)-2-arachidonoyl-gpe (p-16:0/20:4), piperine                                                                                                                                                                                                                                                                                                                                                                                                                                                                                                                                                                                                                                                                                                                                                                                                                                                                                                                                                                                                                                                                                                                                                             |
| PC4 | 5.33 | 32.23 | 2-methylcitrate/homocitrate, 2-palmitoyl-gpc (16:0), 1-myristoyl-2-arachidonoyl-gpc (14:0/20:4), 1-stearoyl-2-oleoyl-gpi (18:0/18:1), 4-cholesten-3-one, 1-palmitoleoyl-2-linolenoyl-gpc (16:1/18:3), oleoyl-arachidonoyl-glycerol (18:1/20:4) [2], palmitoleoyl-linoleoyl-glycerol (16:1/18:2) [1], 1-oleoyl-2-linoleoyl-gpe (18:1/18:2), 1-palmitoyl-2-arachidonoyl-gpe (16:0/20:4), 1-linolenoylglycerol (18:3), 1-stearoyl-2-oleoyl-gpc (18:0/18:1), 1-palmitoyl-2-oleoyl-gpe (16:0/18:1), palmitoleoyl-arachidonoyl-glycerol (16:1/20:4) [2], 1-stearoyl-2-arachidonoyl-gpe (18:0/20:4), 1-palmitoyl-2-oleoyl-gpc (16:0/18:1), oleoyl-oleoyl-glycerol (18:1/18:1) [2], 1-stearoyl-2-linoleoyl-gpi (18:0/18:2), 1-palmitoyl-2-oleoyl-gpi (16:0/18:1), 1-palmitoleoyl-gpc (16:1), 2,4-di-tert-butylphenol, 1-stearoyl-gpc (18:0), linoleoyl-linolenoyl-glycerol (18:2/18:3) [2], 1-palmitoyl-2-linoleoyl-gpc (16:0/18:2), 1-palmitoyl-2-linoleoyl-gpe (16:0/18:2), 1-palmitoyl-2-dihomo-linolenoyl-gpc (16:0/20:3n3 or 6), 1-palmitoyl-2-linoleoyl-gpi (16:0/18:2), oleoyl-linoleoyl-glycerol (18:1/18:2) [1], 2-stearoyl-gpe (18:0), 1-stearoyl-2-arachidonoyl-gpi (18:0/20:4), 1-stearoyl-2-oleoyl-gpe (18:0/18:1), 1-palmitoyl-2-arachidonoyl-gpi (16:0/20:4), oleoyl-linoleoyl-glycerol (18:1/18:2) [2], 1-palmitoyl-gpe (16:0), alpha-tocopherol, 1-linolenoyl-gpc (18:3), 1-palmitoyl-gpc (16:0), 1-stearoyl-2-linoleoyl-gpe (18:0/18:2), 1-stearoyl-gpe (18:0) |
| PC5 | 3.77 | 36    | 1-(1-enyl-oleoyl)-gpe (p-18:1), sphingomyelin (d18:1/20:1, d18:2/20:0), sphingomyelin (d18:1/22:1, d18:2/22:0, d16:1/24:1), sphingomyelin (d18:2/23:0, d18:1/23:1, d17:1/24:1), lactosyl-n-behenoyl-sphingosine (d18:1/22:0), palmitoyl sphingomyelin (d18:1/16:0), sphingomyelin (d18:2/16:0, d18:1/16:1), sphingomyelin (d18:1/22:2, d18:2/22:1, d16:1/24:2), 1-stearoyl-2-linoleoyl-gpc (18:0/18:2), sphingomyelin (d18:2/21:0, d16:2/23:0), 1-(1-enyl-stearoyl)-gpe (p-18:0), 1-oleoyl-gps (18:1), 1-stearoyl-2-oleoyl-gps (18:0/18:1), tricosanoyl sphingomyelin (d18:1/23:0), taurine, 1-palmitoleoylglycerol (16:1)                                                                                                                                                                                                                                                                                                                                                                                                                                                                                                                                                                                                                                                                                                                                                                                                                                               |

<sup>1</sup>Based on principal components analysis of 930 log transformed metabolites. <sup>2</sup>Metabolites appear in order of loadings, with metabolites with highest loadings listed first.

**Table S21.** Adjusted linear regression predicting red meat, processed, and total meat consumption from top principal components from principal components analysis, with adjustment for additional potential dietary confounders.

|                                            | $\beta$ | SE   | T value | p value | Correlation coefficient | P value (Correlation) |
|--------------------------------------------|---------|------|---------|---------|-------------------------|-----------------------|
| <b>Red meat, model 1<sup>1</sup></b>       |         |      |         |         |                         |                       |
| PC1                                        | 0.51    | 1.44 | 0.35    | 0.72    | 0.12                    | 0.28                  |
| PC3                                        | -2.01   | 1.48 | -1.36   | 0.18    |                         |                       |
| PC4                                        | 0.99    | 1.13 | 0.88    | 0.38    |                         |                       |
| <b>Red meat, model 2<sup>2</sup></b>       |         |      |         |         |                         |                       |
| PC1                                        | 0.45    | 0.84 | 0.53    | 0.6     | 0.17                    | 0.12                  |
| PC3                                        | -0.96   | 0.82 | -1.18   | 0.24    |                         |                       |
| PC4                                        | 1.71    | 0.64 | 2.67    | 0.009   |                         |                       |
| <b>Total meat, model 3<sup>3</sup></b>     |         |      |         |         |                         |                       |
| PC1                                        | 1.02    | 1.12 | 0.91    | 0.37    | 0.21                    | 0.055                 |
| PC3                                        | -2.19   | 1.14 | -1.92   | 0.06    |                         |                       |
| PC4                                        | 0.69    | 0.88 | 0.79    | 0.43    |                         |                       |
| <b>Total meat, model 2<sup>2</sup></b>     |         |      |         |         |                         |                       |
| PC1                                        | 0.38    | 0.71 | 0.54    | 0.59    | 0.32                    | 0.003                 |
| PC2                                        | -1.6    | 0.68 | -2.34   | 0.022   |                         |                       |
| PC3                                        | -1.73   | 2.51 | -0.69   | 0.49    |                         |                       |
| PC4                                        | 1.47    | 0.54 | 2.71    | 0.0082  |                         |                       |
| <b>Processed meat, model 1<sup>3</sup></b> |         |      |         |         |                         |                       |
| PC1                                        | 0.9     | 0.43 | 2.11    | 0.038   | 0.24                    | 0.026                 |
| PC3                                        | 0.07    | 0.45 | 0.15    | 0.88    |                         |                       |
| PC4                                        | 0.34    | 0.34 | 0.99    | 0.33    |                         |                       |
| <b>Processed meat, model 2<sup>2</sup></b> |         |      |         |         |                         |                       |
| PC1                                        | 0.08    | 0.46 | 0.17    | 0.87    | 0.2                     | 0.07                  |
| PC3                                        | 0.47    | 0.45 | 1.03    | 0.31    |                         |                       |
| PC4                                        | 0.51    | 0.37 | 1.4     | 0.17    |                         |                       |

<sup>1</sup>Adjusted for fish, poultry, dairy, and fruit consumption besides race, sex, age, BMI. <sup>2</sup>Adjusted for daily intake of fiber and saturated fat, in addition to race, sex, age, and BMI. <sup>3</sup>Adjusted for fish, dairy, and fruit consumption, race, sex, age, BMI.

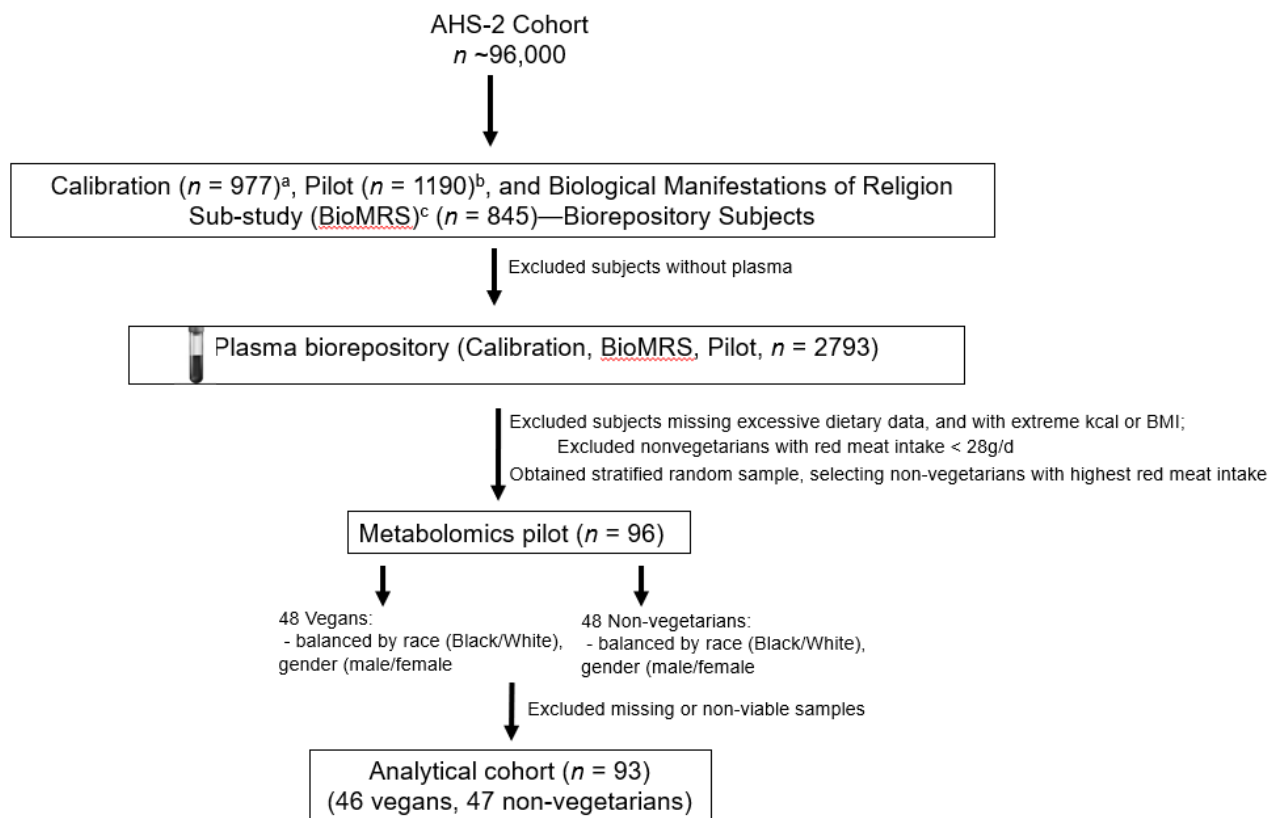

**Figure S1.** Study design for individuals in the Metabolomics Pilot Study. Footnotes: <sup>a</sup>The Calibration sub-study was a random sample of the cohort, except for an overweighting of Black subjects so they formed 40% of the total. <sup>b</sup>The two pilot sub-studies were convenience samples of study subjects living in Texas (Black subjects) or Washington State designed to test our bio-sample acquisition strategies. <sup>c</sup>The BioMRS sub-study was a local sample of AHS-2 subjects who had responded to a request to complete a questionnaire containing psychosocial and religiosity questions. They lived within 50 miles of Loma Linda, Riverside, or downtown Los Angeles and were at least 50 years of age.



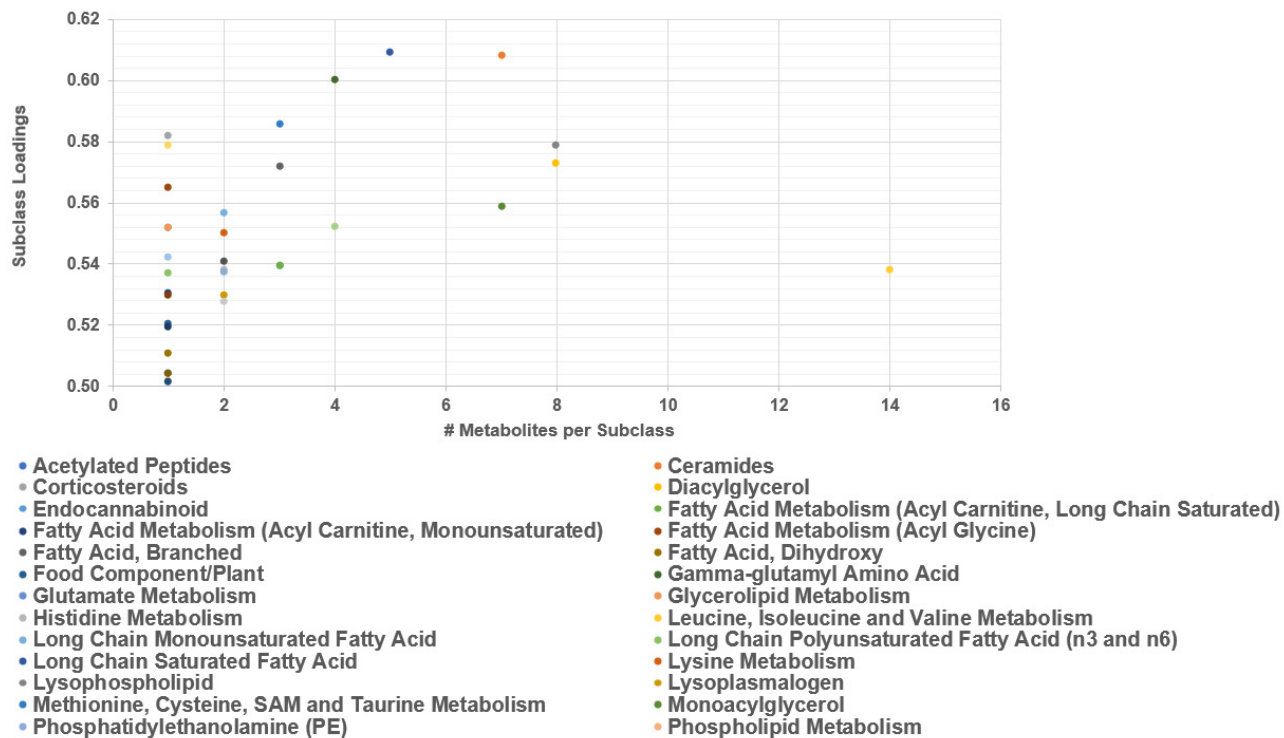

**Figure S2.** Subclass loadings from first principal component (PC1). Principal component analysis was used to identify components explaining variation in metabolites comparing vegans and nonvegetarians. Metabolite loadings > 0.5 were extracted and averaged across each represented subclass.
